# Supplementary material
Source: Royal Society of Chemistry journal article supplement (doi:10.1039/d6ta02016j)
Supplement: d6ta02016j1.pdf [file d6ta02016j1.pdf]

## Supporting Information

### **Orbital overlap-stabilized amorphous metal phosphate frameworks for industrial current density electrocatalysis**

*Jinyan Xie<sup>a,b</sup>, Shiyu Yang<sup>a,b</sup>, Ziyong Zhang<sup>a,c</sup>, Fei Han<sup>a</sup>, Ruizhe Ru<sup>a,b</sup>, Lei Zhang<sup>a</sup>, Zunming Lu<sup>c</sup>, Guowei Li<sup>\*a</sup>, Jun-Qiang Wang<sup>\*a,b</sup>, Juntao Huo<sup>\*a,b</sup>*

J. Xie, S. Yang, Z. Zhang, F. Han, R. Ru, L. Zhang, G. Li, J. Q. Wang, J. Huo

a. Zhejiang Key Laboratory of Magnetic Materials and Applications, Ningbo Institute of Materials Technology and Engineering, Chinese Academy of Science, Ningbo, Zhejiang 315201, China

b. Center of Materials Science and Optoelectronics Engineering, University of Chinese Academy of Sciences, Beijing, 100049, China

Z. Zhang, Z. Lu

c. School of Materials Science and Engineering, Hebei University of Technology, Tianjin 300130, China

E-mail: [liguowei@nimte.ac.cn](mailto:liguowei@nimte.ac.cn) (Guowei Li) or [jqwang@nimte.ac.cn](mailto:jqwang@nimte.ac.cn) (Jun-Qiang Wang) or [huojuntao@nimte.ac.cn](mailto:huojuntao@nimte.ac.cn) (Juntao Huo).

## Experimental Section

### Sample Preparation

The Fe<sub>60-x</sub>Co<sub>10</sub>Ni<sub>10</sub>P<sub>20</sub>Ru<sub>x</sub> ( $x = 0, 1, 2, 3$ ) alloy ingots were prepared from raw materials of (i) Fe–P alloy and Ru (>99.9 wt.%, Beijing Zhongjin Yan New Materials Technology Co., Ltd.) and (ii) pure Fe, Co and Ni (>99.9 wt.%, Zhongnuo Xincai (Beijing) New Materials Technology Co., Ltd.) by melting the charge in an induction furnace under a high-purity argon atmosphere. Subsequently, amorphous alloy in thin strips with a thickness of about 25  $\mu\text{m}$  and a width of about 1 mm were prepared using melt spinning technology with a copper roller whose spinning tangent speed is about 45  $\text{m s}^{-1}$ . The amorphous Fe<sub>60-x</sub>Co<sub>10</sub>Ni<sub>10</sub>P<sub>20</sub>Ru<sub>x</sub> ( $x = 0, 1, 2, 3$ ) strips is denoted as Ru<sub>x</sub> ( $x = 0, 1, 2, 3$ ). Electrochemical acid treatment was carried out in 2 M H<sub>2</sub>SO<sub>4</sub>, and then washed repeatedly with deionized water and anhydrous ethanol to remove residual chemical substances. The dealloyed sample was denoted as Ru<sub>x</sub>-De ( $x = 0, 1, 2, 3$ ).

Preparation of 20 wt.% Pt/C/NF and RuO<sub>2</sub>/NF: 5 mg commercial 20 wt.% Pt/C and RuO<sub>2</sub> nanoparticles were added into a mixed solution of 50  $\mu\text{L}$  Nafion and 950  $\mu\text{L}$  ethanol for ultrasonic dispersion for 30 min to prepare ink. At the same time, 1 cm  $\times$  1 cm NF was ultrasonically cleaned in 1 M HCl for 15 min, and then washed three times with deionized water and ethanol respectively. After NF dried, 200  $\mu\text{L}$  ink was dropped onto NF. Finally, dry the NF loaded with catalyst at room temperature.

### Characterization

The XRD patterns of quenched and dealloyed thin strips were recorded using D8 ADVANCE under Cu-K $\alpha$  radiation ( $\lambda = 1.5418 \text{ \AA}$ ). The TEM analysis was performed on the prepared samples on Talos F200x and Spectra 300. Chemical states were analyzed by XPS using Al-K $\alpha$  X-ray as the excitation source on Axis Ultra DLD. Perform SEM analysis at 8kV and EDS spectroscopic analysis and elemental mapping at 20 kV on S4800. Perform ICP-OES analysis on Apectro Arcos.

### Electrochemical Measurements

The electrochemical performance was studied using a Zennium electrochemical workstation with a three electrode system in 2 M H<sub>2</sub>SO<sub>4</sub> solution and 1 M KOH solution, with graphite rods as the counter electrode and Ag/AgCl electrode as the reference electrode. For the convenience of subsequent calculations, the submerged area of the strip is kept at 0.1  $\text{cm}^2$ . The current density is standardized by the geometric surface area of the sample. According to the Nernst equation:

$$E_{RHE} = E_{Ag/AgCl} + 0.0591 \text{ pH} + 0.2046 \text{ V} \quad (1)$$

where  $E_{\text{RHE}}$  is compared to the potential of the reversible hydrogen electrode and  $E_{\text{Ag/AgCl}}$  is the electrode potential measured when using Ag/AgCl as the reference electrode. A stable CV curve was obtained at a scan rate of 200 mV s<sup>-1</sup>. LSV was performed at a scan rate of 5 mV s<sup>-1</sup>, and iR loss should be used for correction during LSV measurement. Measure EIS in the frequency range of 100 kHz to 0.01 Hz. Stability tests were conducted using chronoamperometry at 10 mA cm<sup>-2</sup> and 500 mA cm<sup>-2</sup>. In addition, the ECSA was measured by CV at scan rates of 20, 40, 60, 80, 100, 120, 140, 160, 180, and 200 mV s<sup>-1</sup> in the non Faraday potential region. According to the relationship:

$$ECSA = \frac{C_{dl}}{C_s} \#(2)$$

where  $C_{dl}$  is electrochemical double-layer capacitance and  $C_s$  is specific capacitance. Due to the flat surface of the MG band, the  $C_s$  value was assumed to be 0.04 mF cm<sup>-2</sup>.<sup>1,2</sup>

The formula for calculating the flip frequency (TOF):

$$TOF = \frac{j \cdot A \cdot Z^{-1} \cdot F^{-1} \cdot N_A}{v_a \cdot ECSA} \#(3)$$

$j$  represents the current density obtained from the polarization curve,  $Z$  represents the number of moles of active material (4 for OER, 2 for HER),  $F$  is the Faraday constant (98485.3 C mol<sup>-1</sup>),  $N_A$  is Avogadro's number (6.022×10<sup>23</sup> mol<sup>-1</sup>), and  $v_a$  is the amount of active sites on the surface (for alloy materials, generally 1×10<sup>15</sup>).

The AEM electrolyzer cell utilized in this study has an external dimension of 10 cm × 10 cm, with an internal flow field area of 1 cm × 1 cm. A serpentine flow field was employed, and the operating temperature was 80°C (80 ± 2°C). Both the anode and the cathode will splice the strips into suitable sizes for direct use, with nickel foam serving as both the current collector and gas diffusion layer, without any additional gas diffusion layer. We used the Versogen PiperION A20 anion exchange membrane, which has a thickness of 20 micrometers, and it was pre-treated by soaking in 1 M KOH for 24 hours prior to use. The performance of the AEM electrolyzer in a 30 wt.% KOH electrolyte using an four-channel electrochemical workstation (CS310X). The electrolyte flow rate employed for testing was 100 mL min<sup>-1</sup>. The polarization curve was measured using LSV technique at a scan rate of 5 mV s<sup>-1</sup>. The durability test was carried out by the CP technique at a current density of 1000 mA cm<sup>-2</sup>.

### Calculation Setup

The first-principles calculations were performed using the Vienna Ab initio Simulation Package (VASP). The interaction between ions and valence electrons was described by the projector augmented wave (PAW) method, and the exchange–correlation energy was treated within the

generalized gradient approximation (GGA) using the Perdew–Burke–Ernzerhof (PBE) functional. To accurately describe the strongly correlated 3d electrons of transition metals, the DFT+U approach within the Dudarev formalism was applied with  $U_{\text{eff}}(\text{Ni}) = 6.2$  eV and  $U_{\text{eff}}(\text{Co}) = 3.32$  eV. A plane-wave cutoff energy of 520 eV was adopted to ensure energy convergence. For bulk models, an  $8 \times 8 \times 4$  Gamma-centered k-point mesh was used, while a  $6 \times 1 \times 3$  k-point grid was employed for surface slab models. The structures were fully optimized until the residual forces on each atom were less than  $0.01$  eV  $\text{\AA}^{-1}$  and the total energy convergence threshold was set to  $10^{-6}$  eV. In the slab models, a vacuum layer of at least  $15$   $\text{\AA}$  was applied along the z-direction to prevent spurious interactions between periodic images. For asymmetric slab models, dipole corrections were included to eliminate artificial electrostatic interactions. Spin polarization was taken into account in all calculations. The PDOS was obtained by projecting the Kohn–Sham wave functions onto the Ni 3d, Co 3d, Ru 4d, and O 2p orbitals. The d-band center was calculated according to:

$$\varepsilon_d = \frac{\int E \times D_d(E) dE}{\int D_d(E) dE} \quad \#(4)$$

where  $D_d(E)$  denotes the density of states of the transition-metal d orbitals. Phonon dispersion calculations were carried out using density functional perturbation theory (DFPT) and post-processed with the PHONOPY package.

The formation energy of the Ru-doped structures was calculated to assess their thermodynamic stability, which can be defined as:

$$E_{\text{form}} = E_{\text{doped}} - E_{\text{host}} - \mu_{\text{Ru}} + \mu_{\text{M}} \quad \#(5)$$

where  $E_{\text{doped}}$  and  $E_{\text{host}}$  denote the total energies of the doped and pristine systems, respectively, and  $\mu_{\text{Ru}}$  and  $\mu_{\text{M}}$  represent the chemical potentials of Ru and the substituted metal atom.

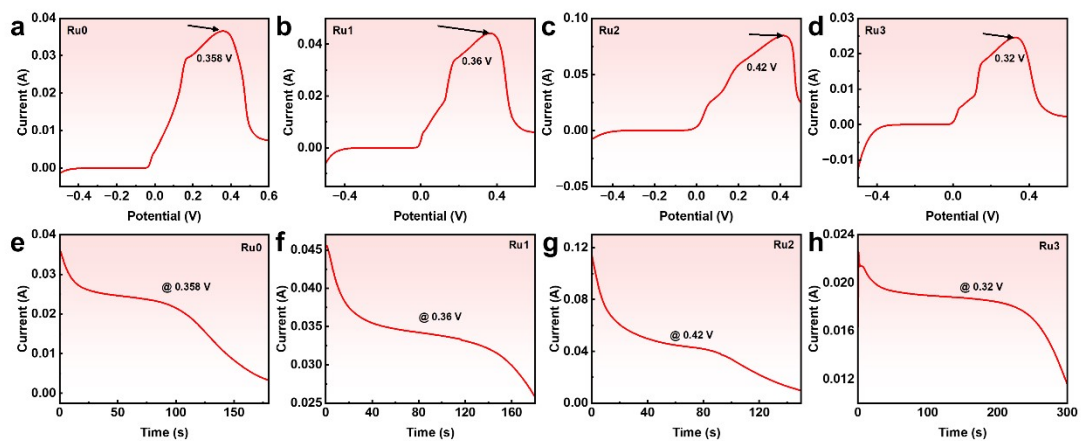

**Fig. S1** Electrochemical dealloying parameters of  $Ru_x$  ( $x=0, 1, 2, 3$ ) amorphous alloy precursor. (a-d) Dealloying voltage. (e-h) Dealloying time.

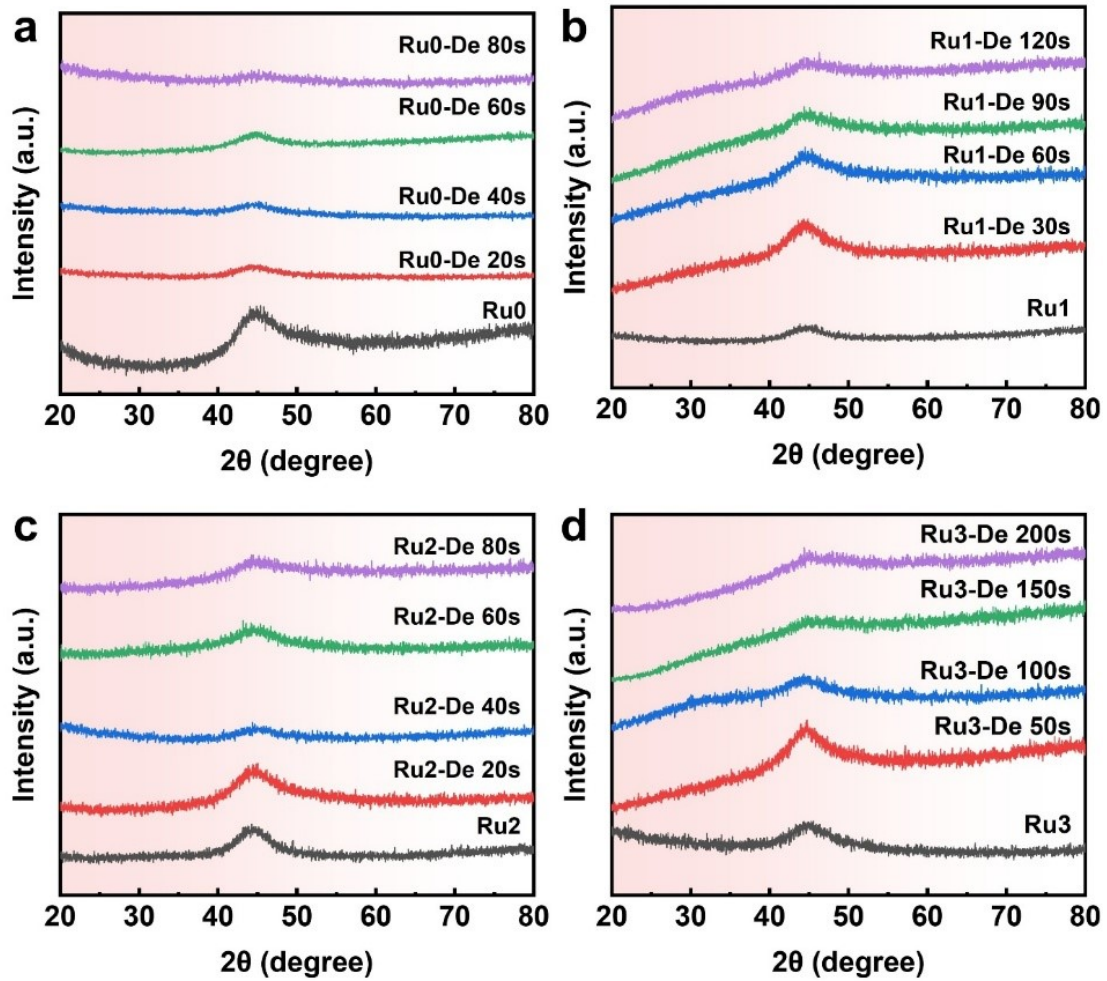

Fig. S2 XRD patterns at different dealloying times. (a) Ru0, (b) Ru1, (c) Ru2, and (d) Ru3.

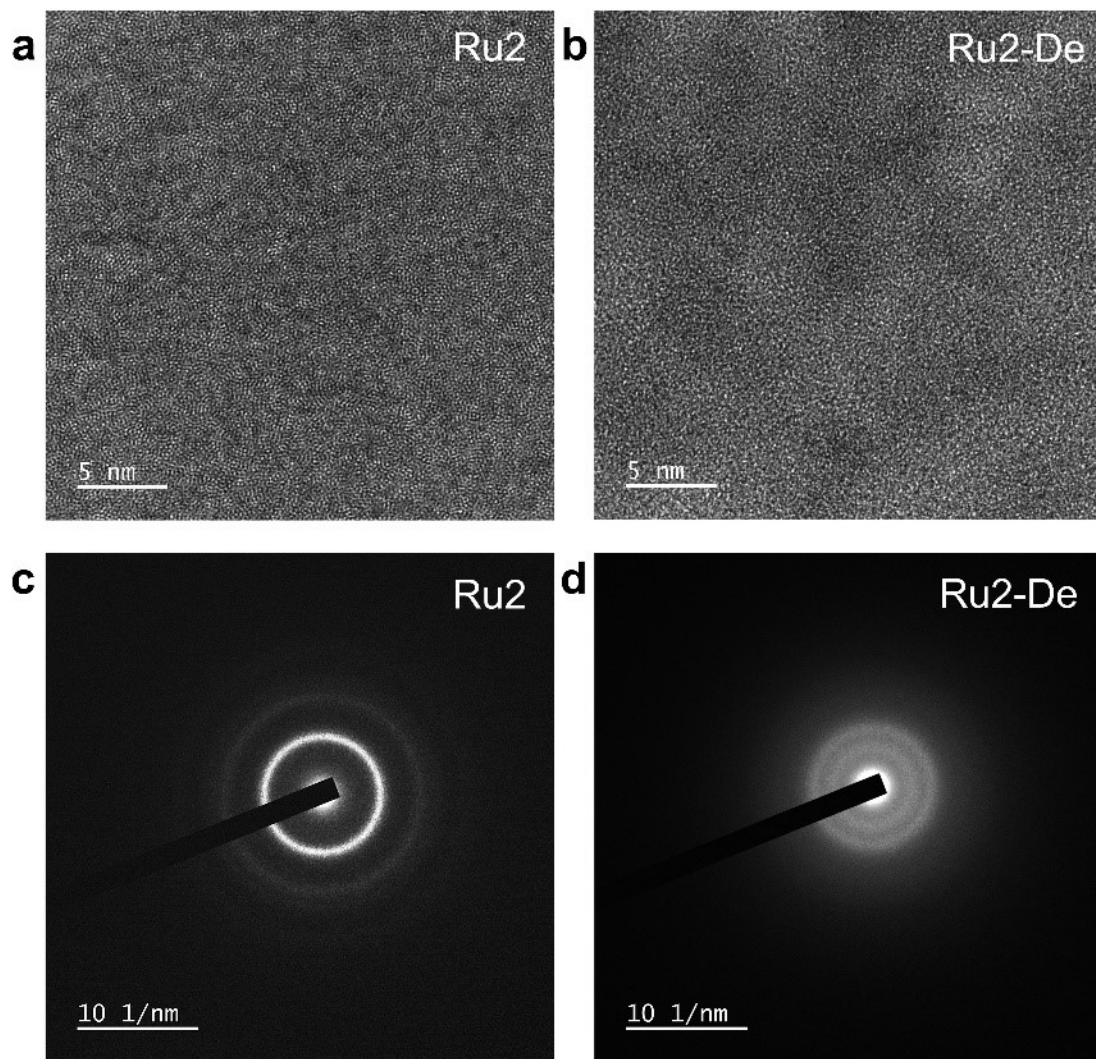

**Fig. S3** HRTEM images (a) before and (b) after dealloying treatment. (c) (d) Corresponding SAED patterns.

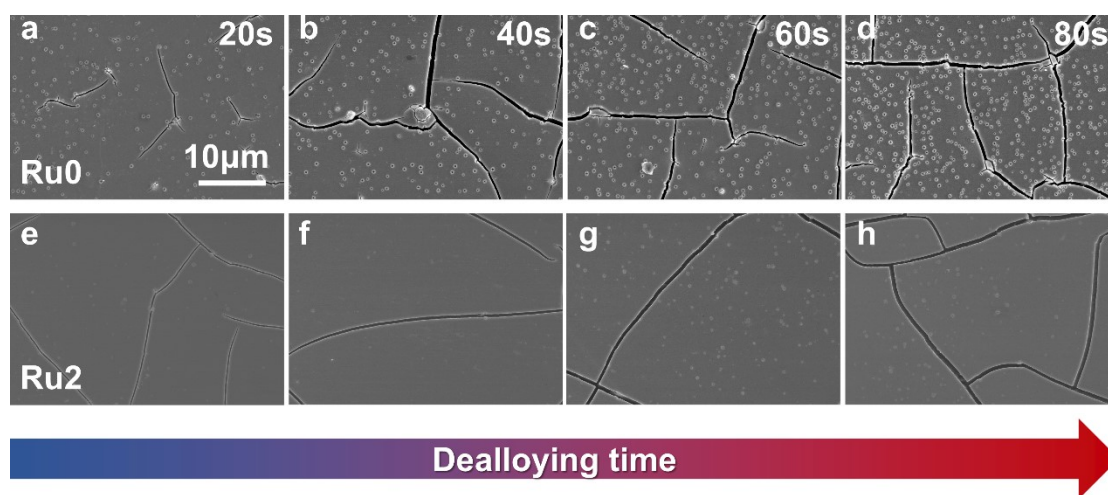

**Fig. S4** SEM morphology of surfaces at different dealloying times. (a-d) Ru0, (e-h) Ru2.

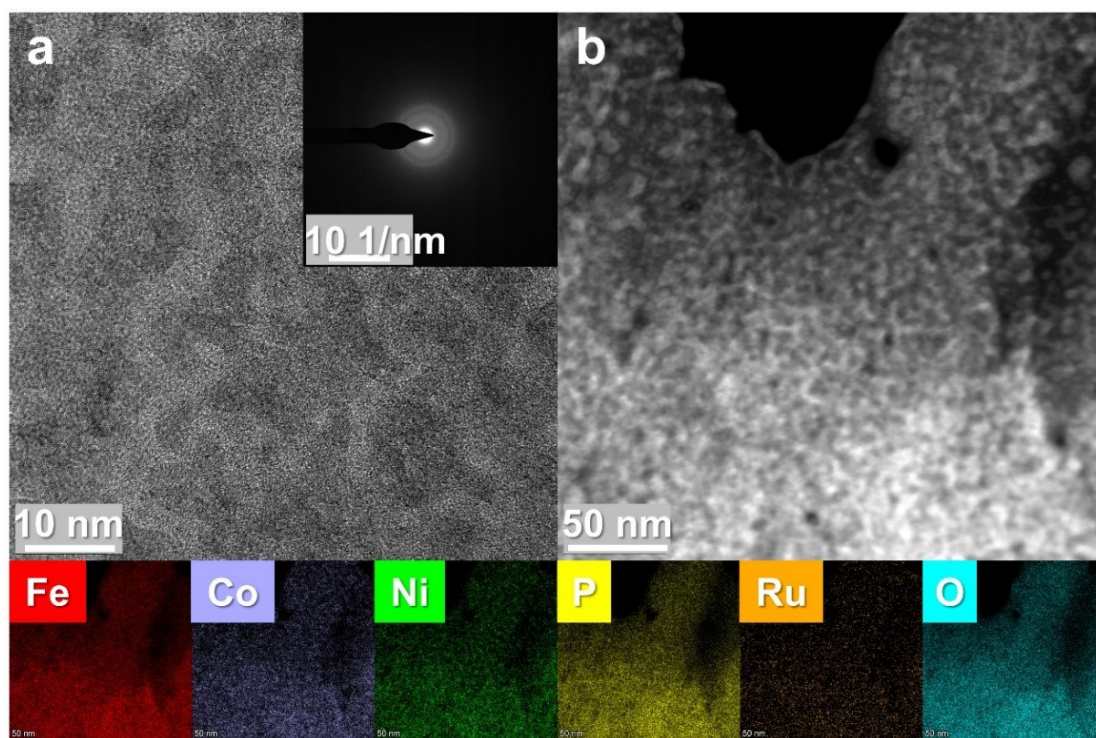

**Fig. S5** Structural analysis of Ru<sub>2</sub>-De. (a) HRTEM image and SAED image. (b) STEM image.

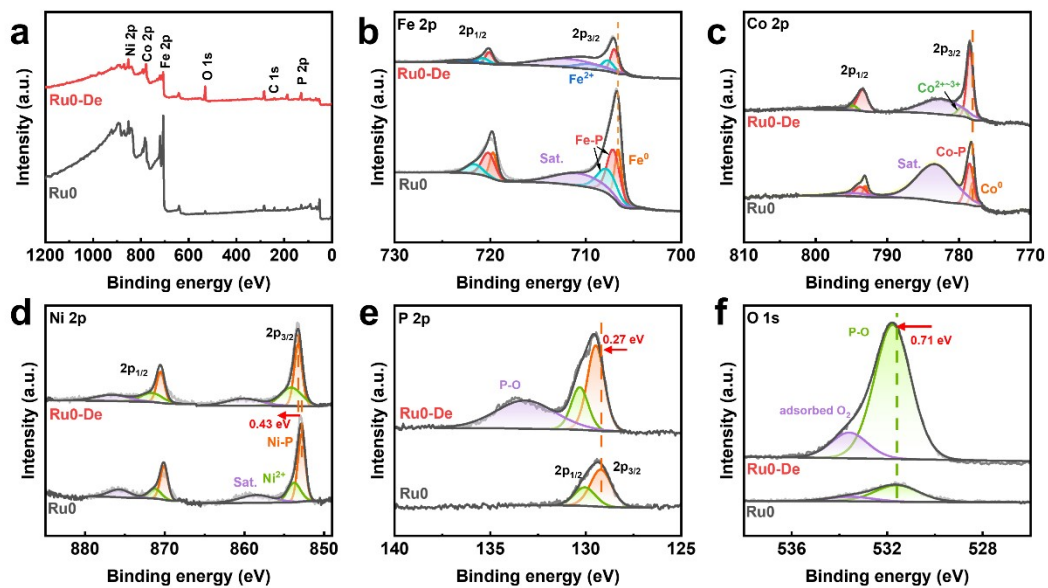

**Fig. S6** XPS spectra of Ru0 and Ru0-De. (a) Survey spectrum. high-resolution XPS spectra of (b) Fe 2p, (c) Co 2p, (d) Ni 2p, (e) P 2p and (f) O 2p.

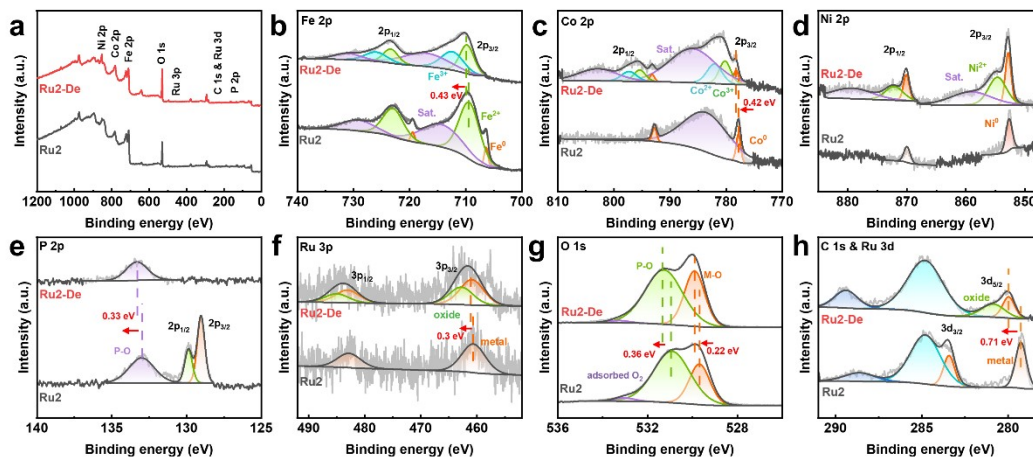

**Fig. S7** XPS spectra of Ru2 and Ru2-De. (a) Survey spectrum. high-resolution XPS spectra of (b) Fe 2p, (c) Co 2p, (d) Ni 2p, (e) P 2p, (f) Ru 3p, (g) Ru 3p, (g) O 1s and (h) C 1s & Ru 3d.

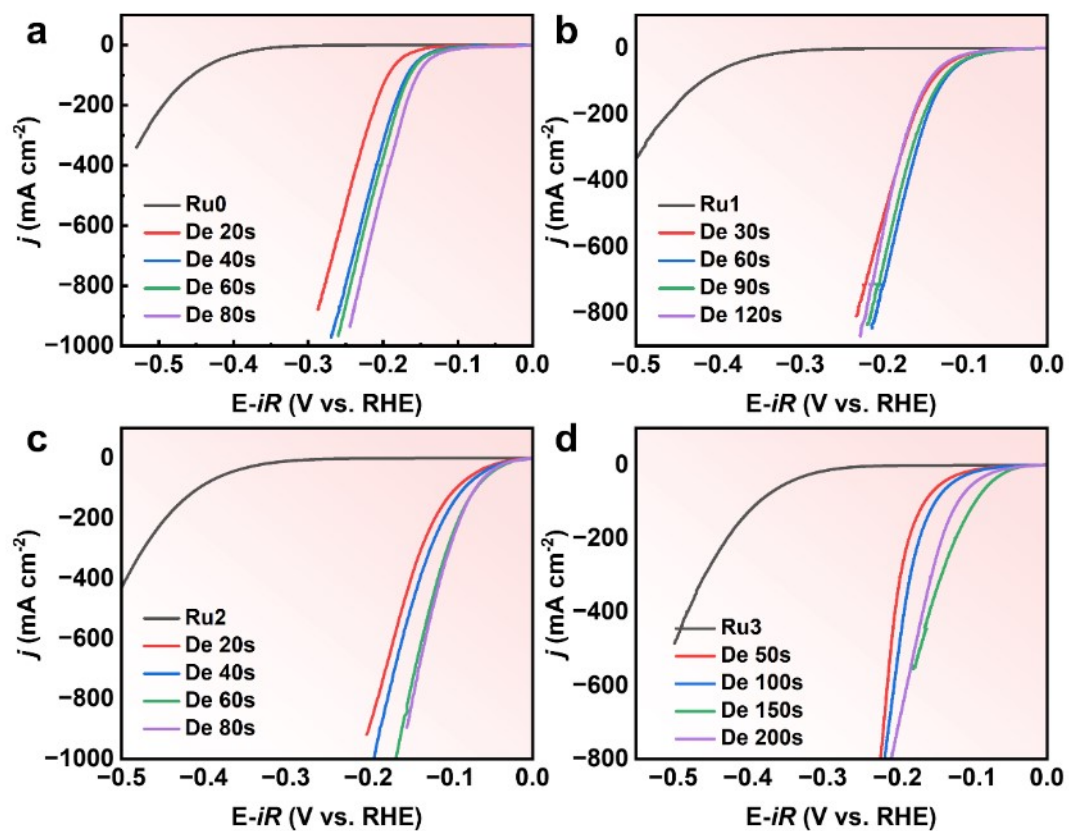

**Fig. S8** HER polarization curves of dealloyed samples. (a) Ru0, (b) Ru1, (c) Ru2 and (d) Ru3.

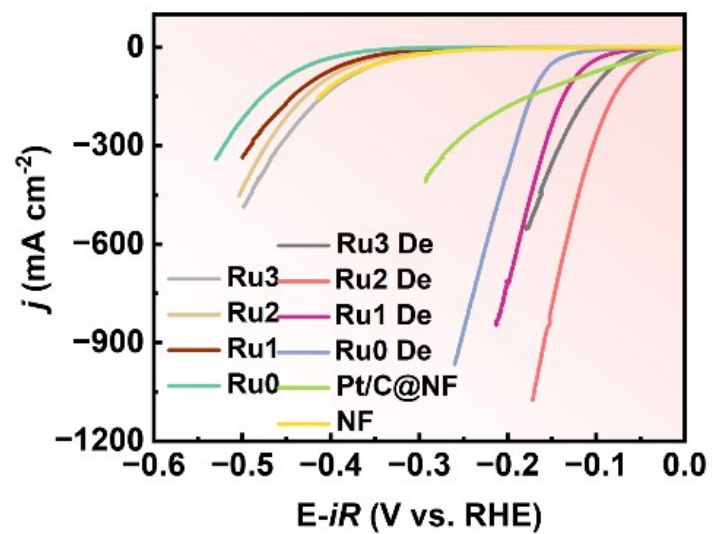

**Fig. S9** HER polarization curves of Ru<sub>x</sub>, Ru<sub>x</sub>-De (x=0,1,2,3), Pt/C@NF, and NF.

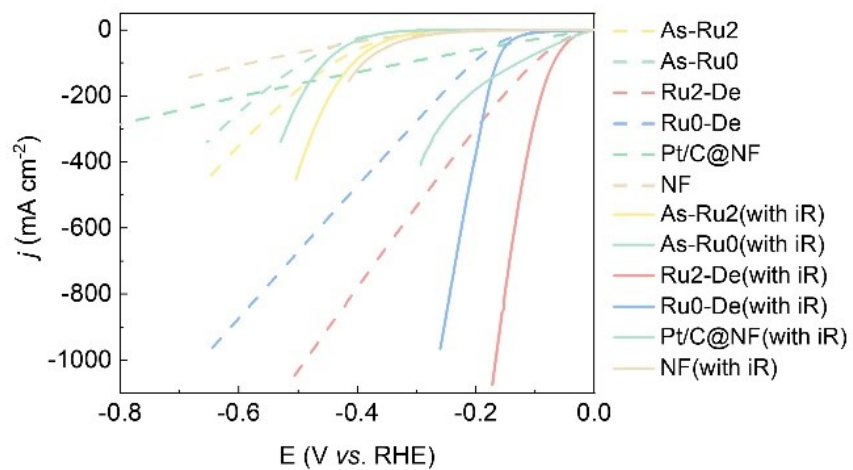

**Fig. S10** HER polarization curves of different catalysts (including before and after iR compensation, 95% iR compensation).

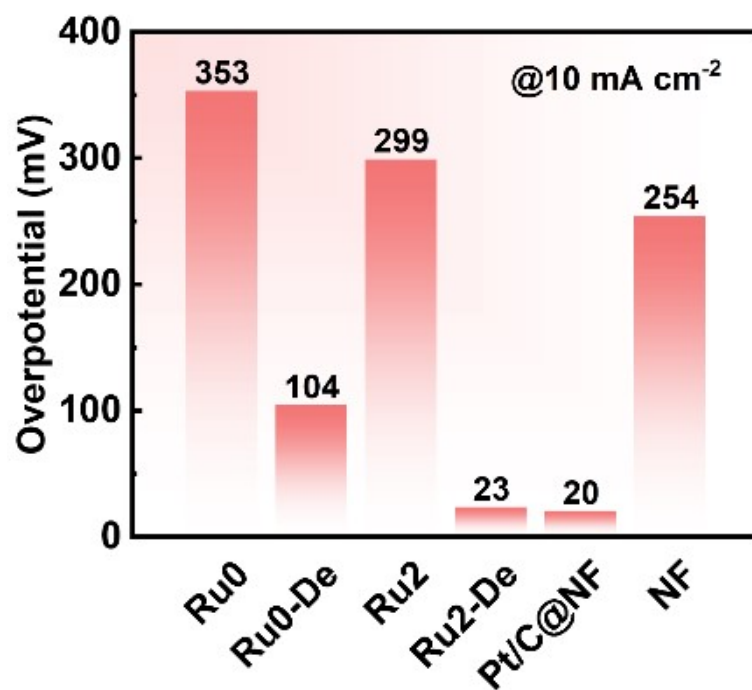

**Fig. S11** Comparison of HER overpotentials at 10 mA cm<sup>-2</sup> for Ru0, Ru0-De, Ru2, Ru2-De, Pt/C@NF, and NF.

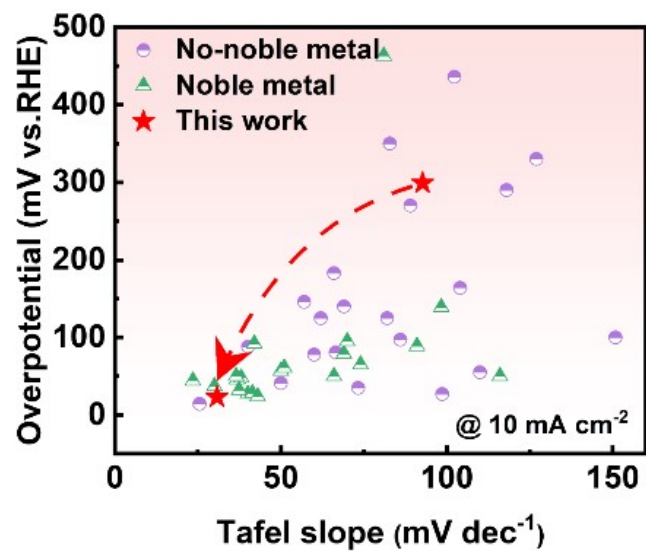

**Fig. S12** Comparison of HER activity with recently reported electrocatalysts.

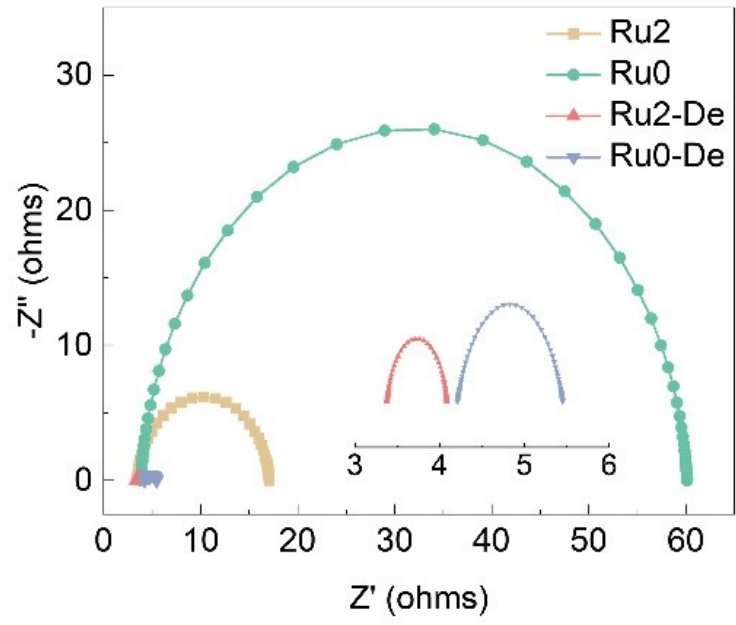

**Fig. S13** EIS Nyquist plots for HER.

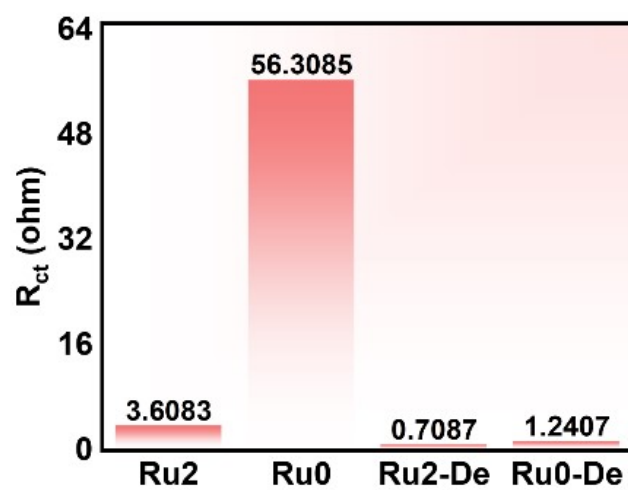

**Fig. S14** Comparison of the HER electrochemical transfer resistance of Ru0, Ru0-De, Ru2 and Ru2-De.

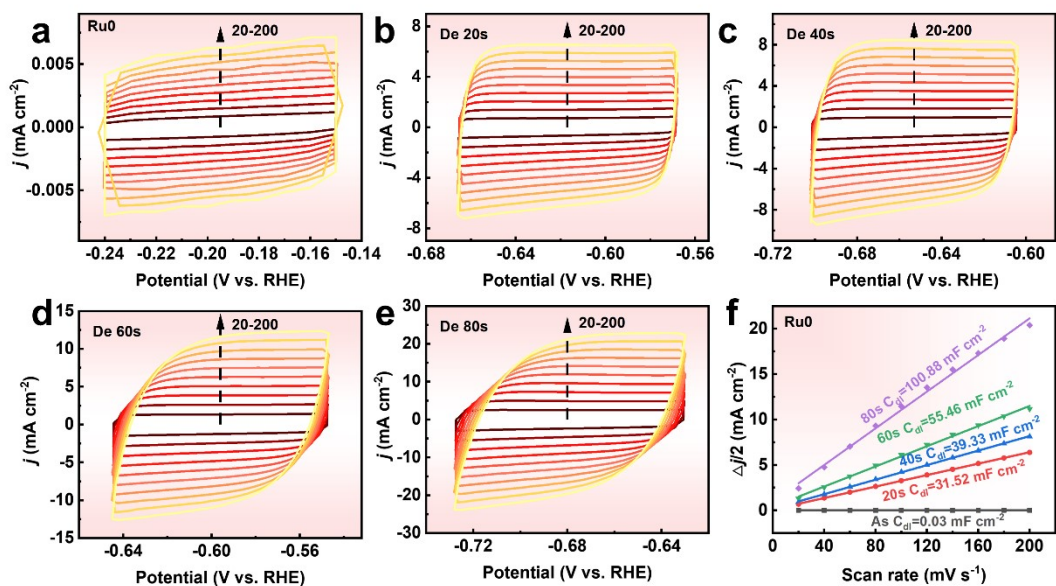

**Fig. S15** Cyclic voltammogram (CV) curves in 1 M KOH for (a) Ru0, (b) Ru0-De 20s, (c) Ru0-De 40s, (d) Ru0-De 60s, (e) Ru0-De 80s. (f) Capacitive current as a function of scan rates.

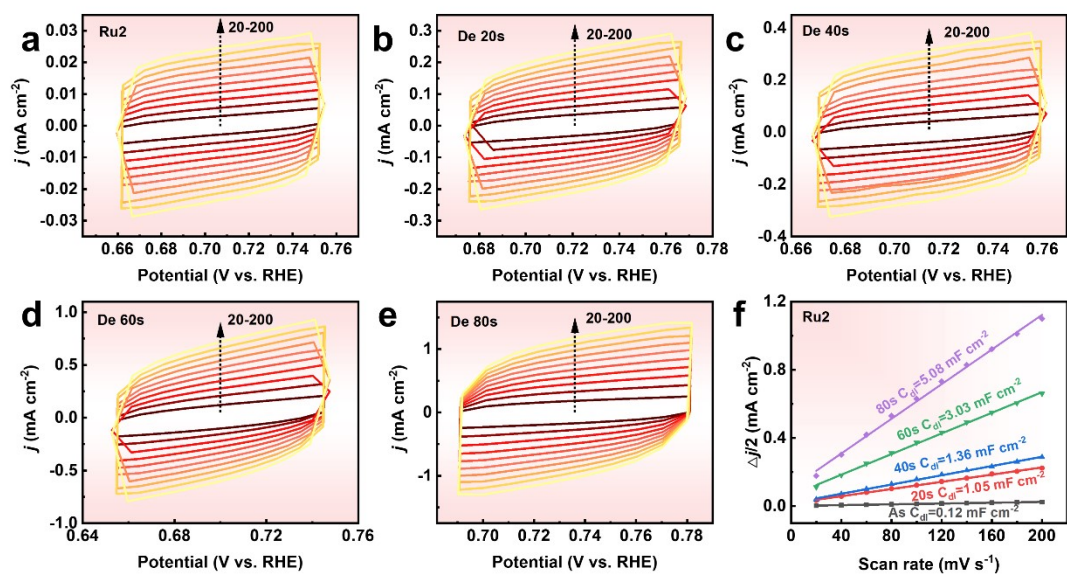

**Fig. S16** Cyclic voltammogram (CV) curves in 1 M KOH for (a) Ru2, (b) Ru2-De 20s, (c) Ru2-De 40s, (d) Ru2-De 60s, (e) Ru2-De 80s. (f) Capacitive current as a function of scan rates.

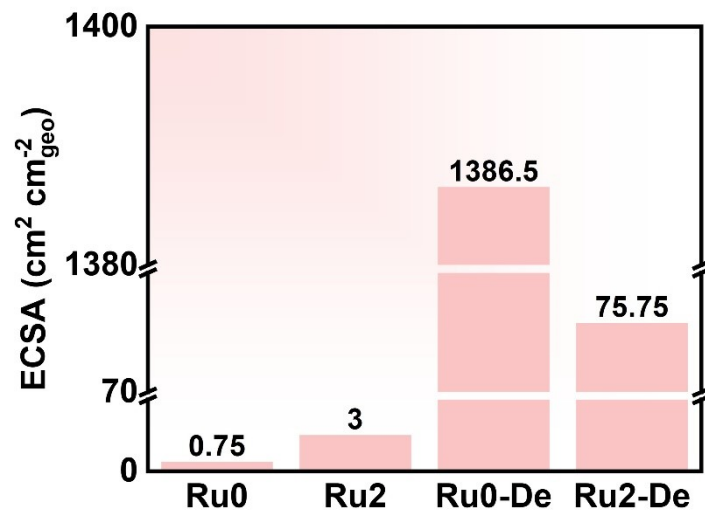

**Fig. S17** Comparison of the electrochemical active specific surface area of Ru0, Ru0-De, Ru2 and Ru2-De.

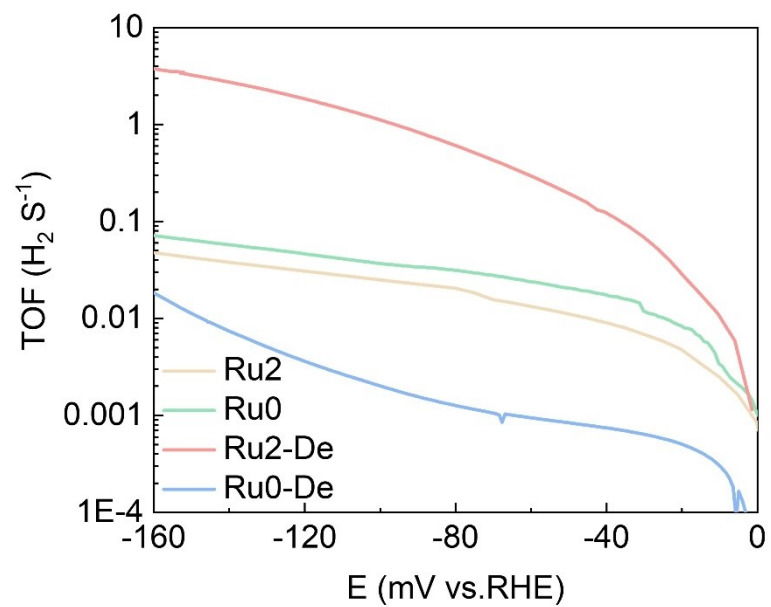

**Fig. S18 TOF curves of Ru2, Ru0, Ru2-De, and Ru0-De.**

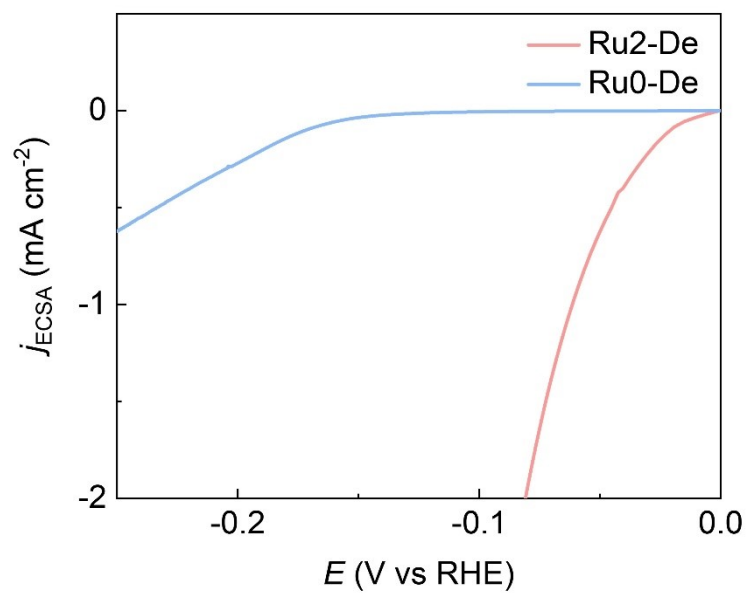

**Fig. S19** Normalized polarization curves of Ru2-De and Ru0-De.

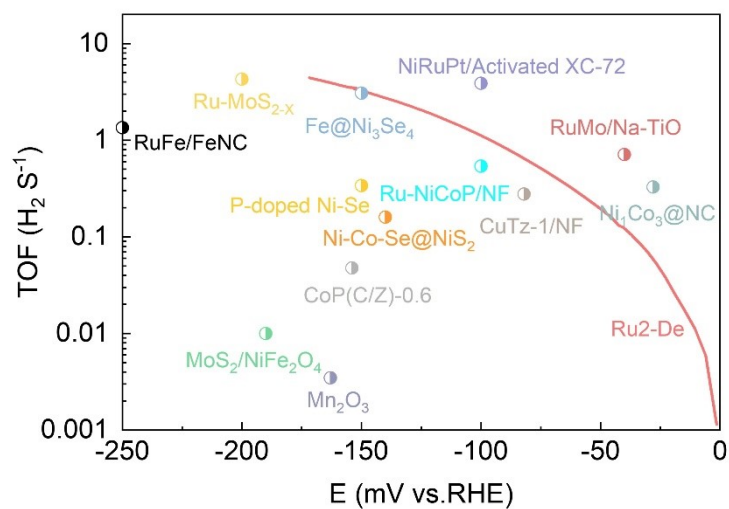

**Fig. S20** Comparison of the TOF of Ru2-De catalyst with the recently reported state-of-the-art catalysts.

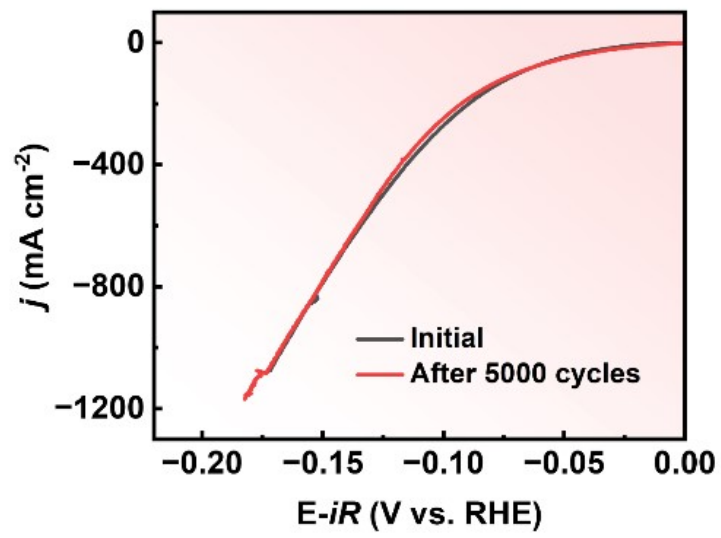

**Fig. S21** Comparison of polarization curves of Ru2-De catalyst after 5000 CV cycles.

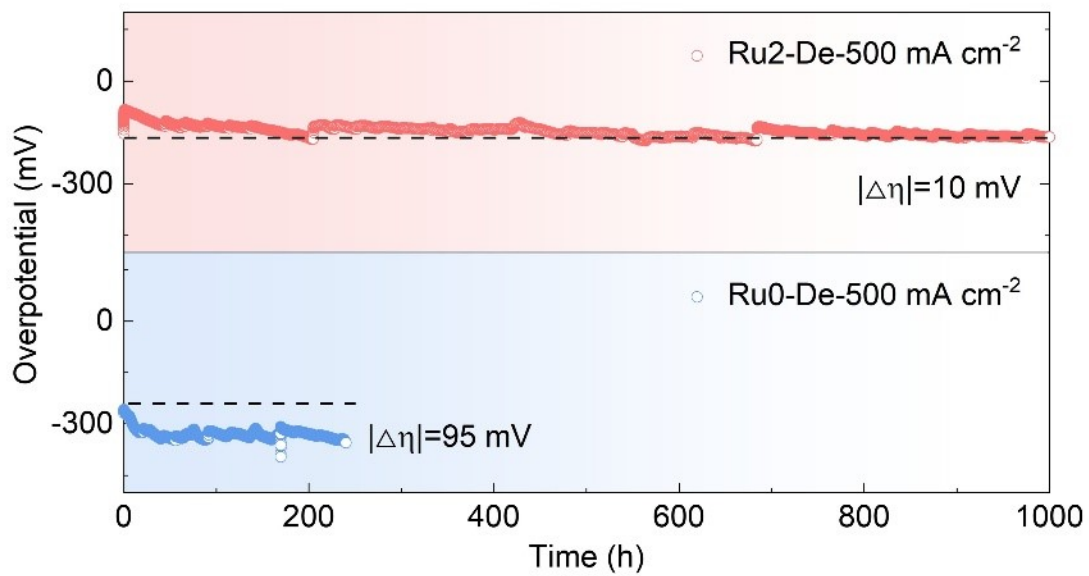

**Fig. S22** Long-term stability tests of Ru0-De and Ru2-De electrodes at cathode under a constant current density of 500 mA cm<sup>-2</sup>.

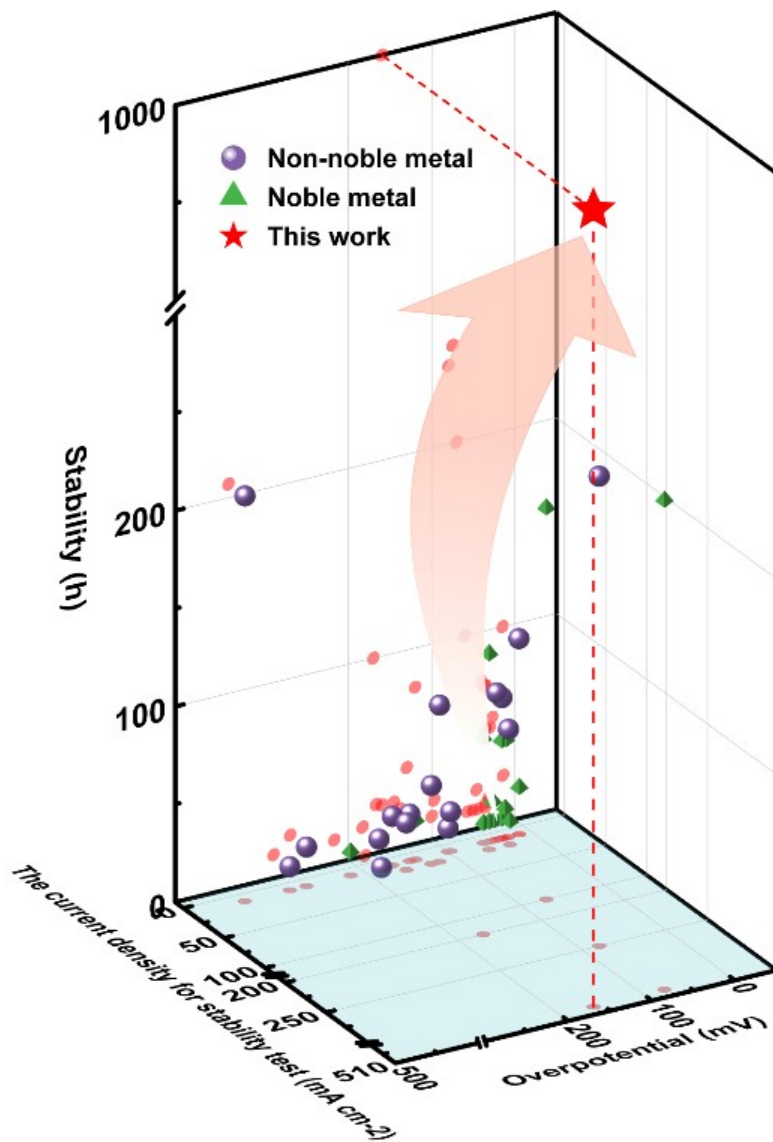

**Fig. S23** Comparison of HER activity and stability with recently reported electrocatalysts.

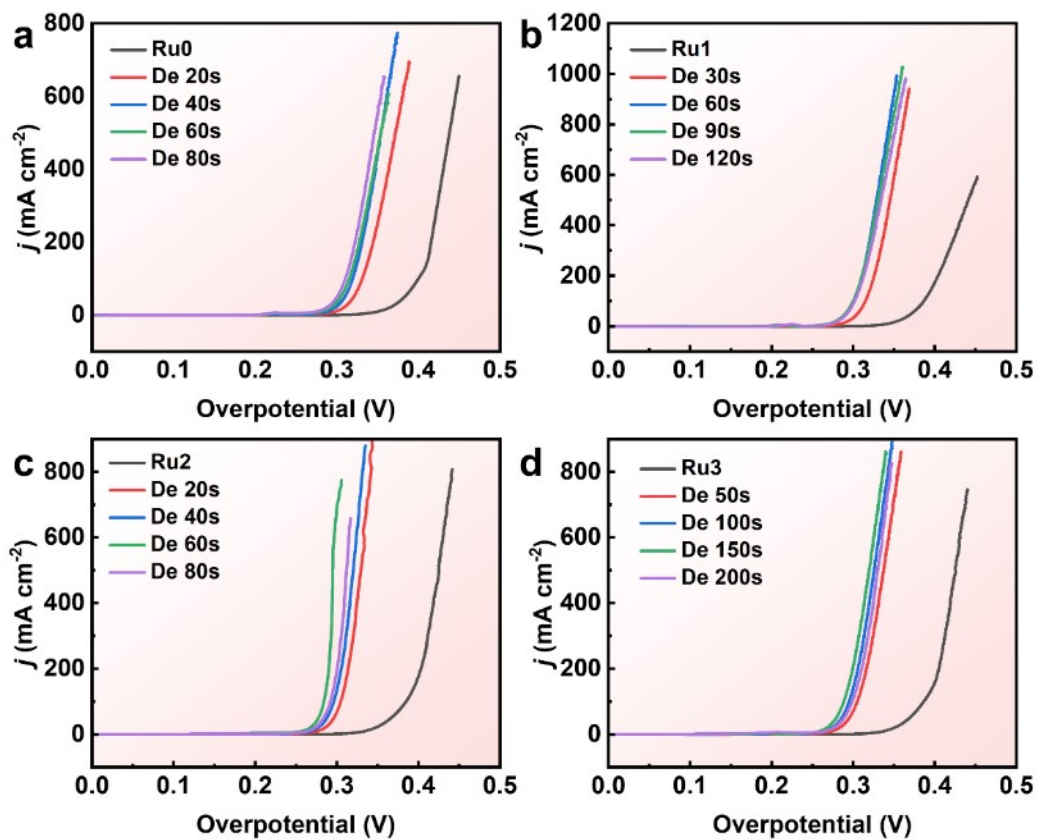

**Fig. S24** OER polarization curves of dealloyed samples. (a) Ru0, (b) Ru1, (c) Ru2 and (d) Ru3.

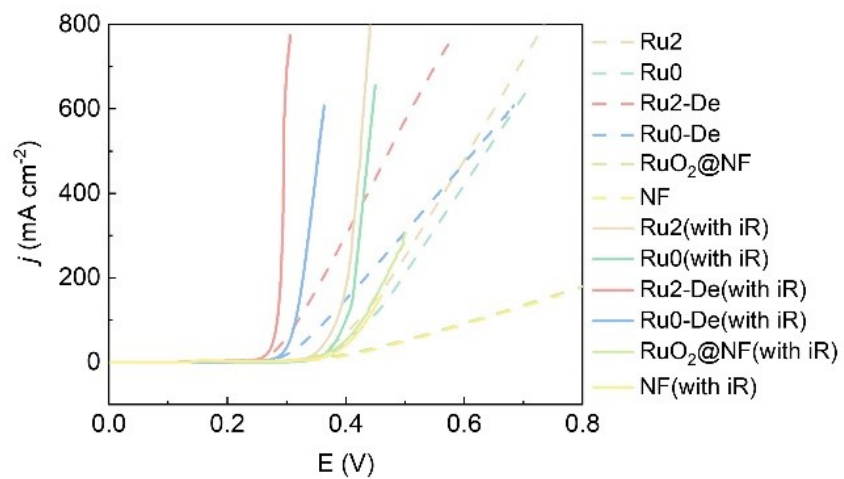

**Fig. S25** OER polarization curves of different catalysts (including before and after iR compensation, 95% iR compensation).

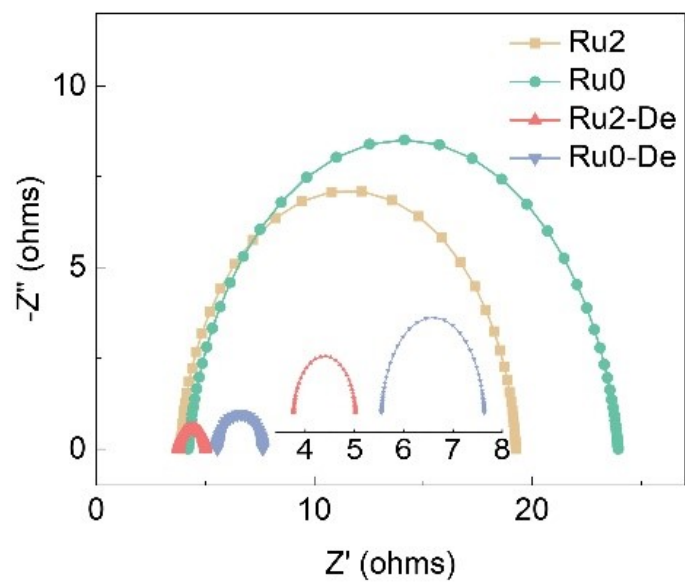

**Fig. S26** EIS Nyquist plots for OER.

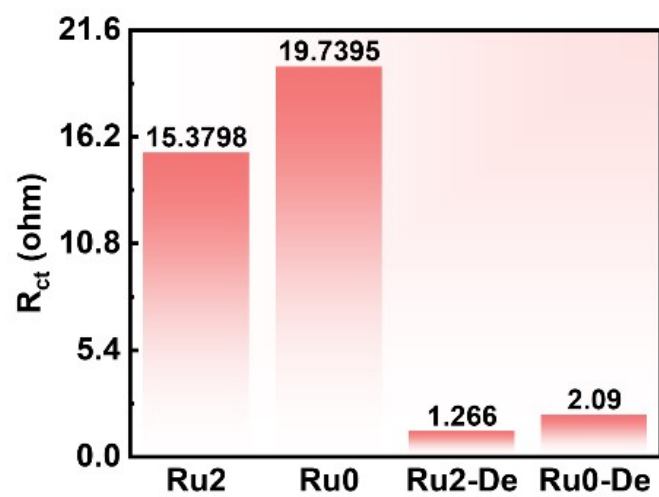

**Fig. S27** Comparison of the OER electrochemical transfer resistance of Ru0, Ru0-De, Ru2 and Ru2-De.

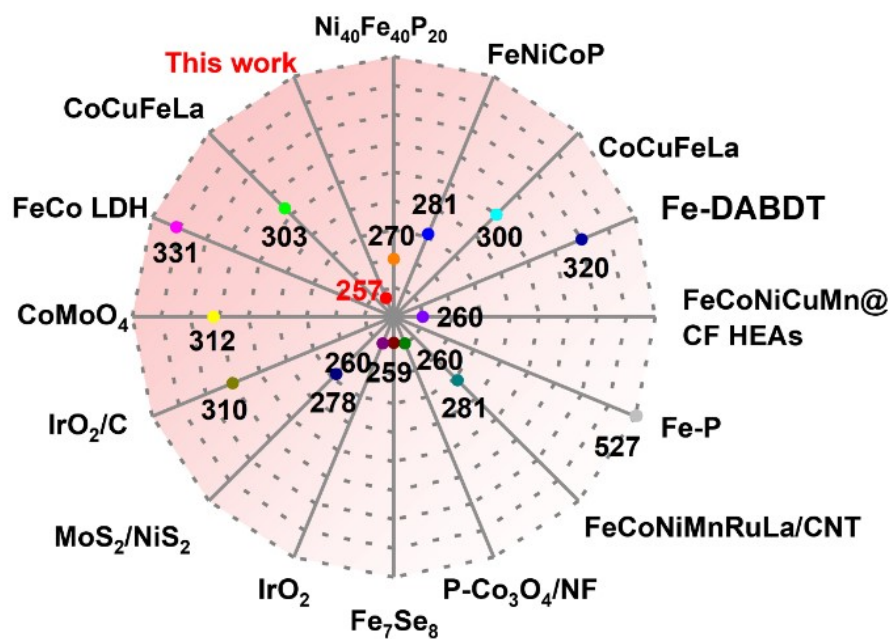

**Fig. S28** Comparison of OER activity with recently reported electrocatalysts.

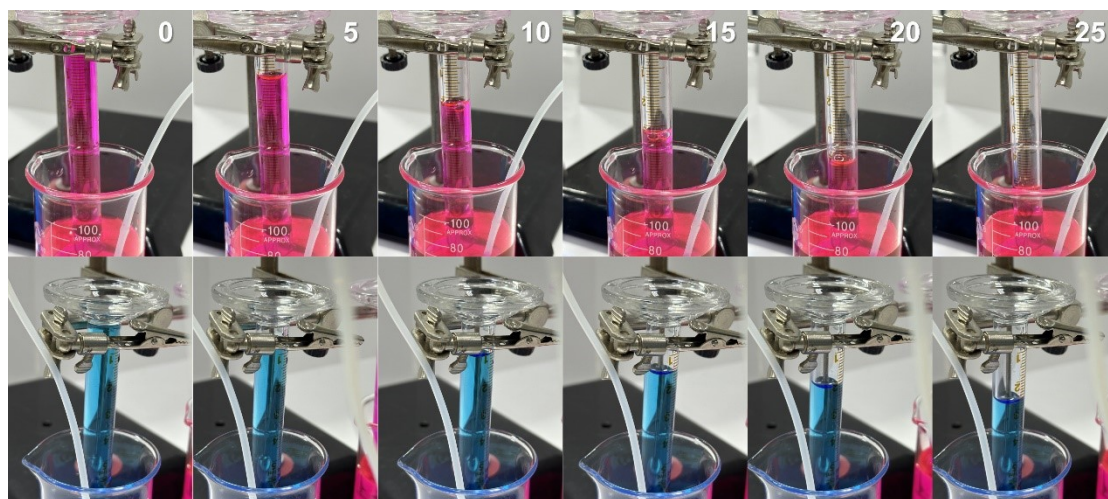

**Fig. S29** Faradaic efficiency experiment of overall water splitting.

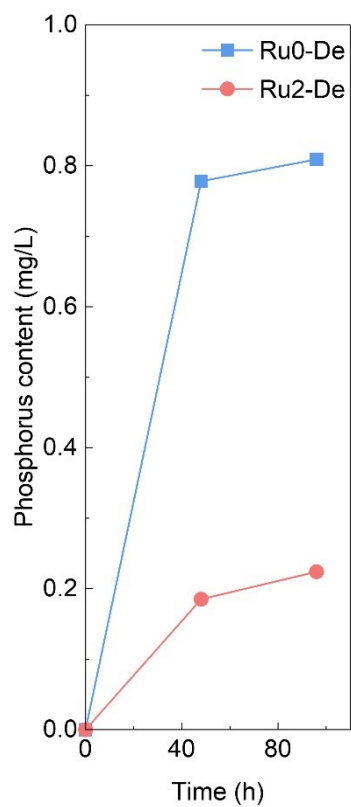

**Fig. S30** Inductively coupled plasma optical emission spectroscopy (ICP-OES) results of Ru0-De and Ru2-De tested for 2 and 4 days at an anodic constant current density of  $500\text{mA cm}^{-2}$ .

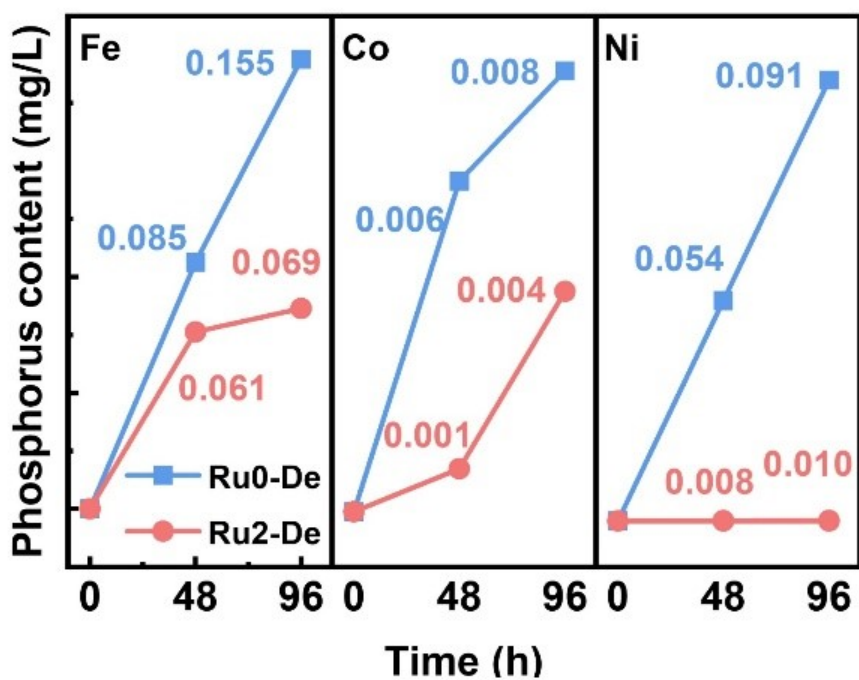

**Fig. S31** ICP-OES results of Ru0-De and Ru2-De tested for 2 and 4 days at an anodic constant current density of 500mA cm<sup>-2</sup>.

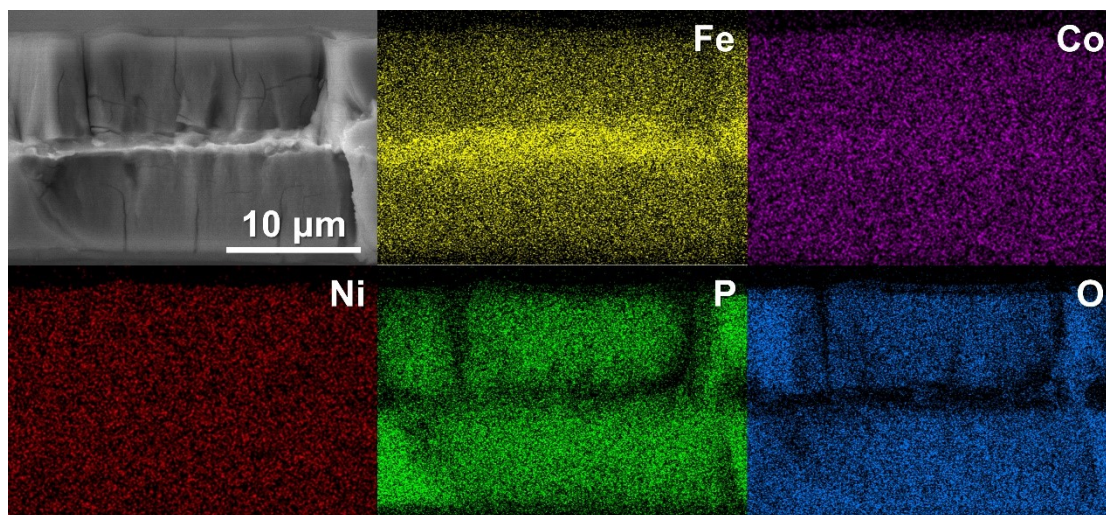

**Fig. S32** Cross-sectional SEM images and EDS mapping images of Ru0-De after a 4-day constant current test at  $500 \text{ mA cm}^{-2}$ .

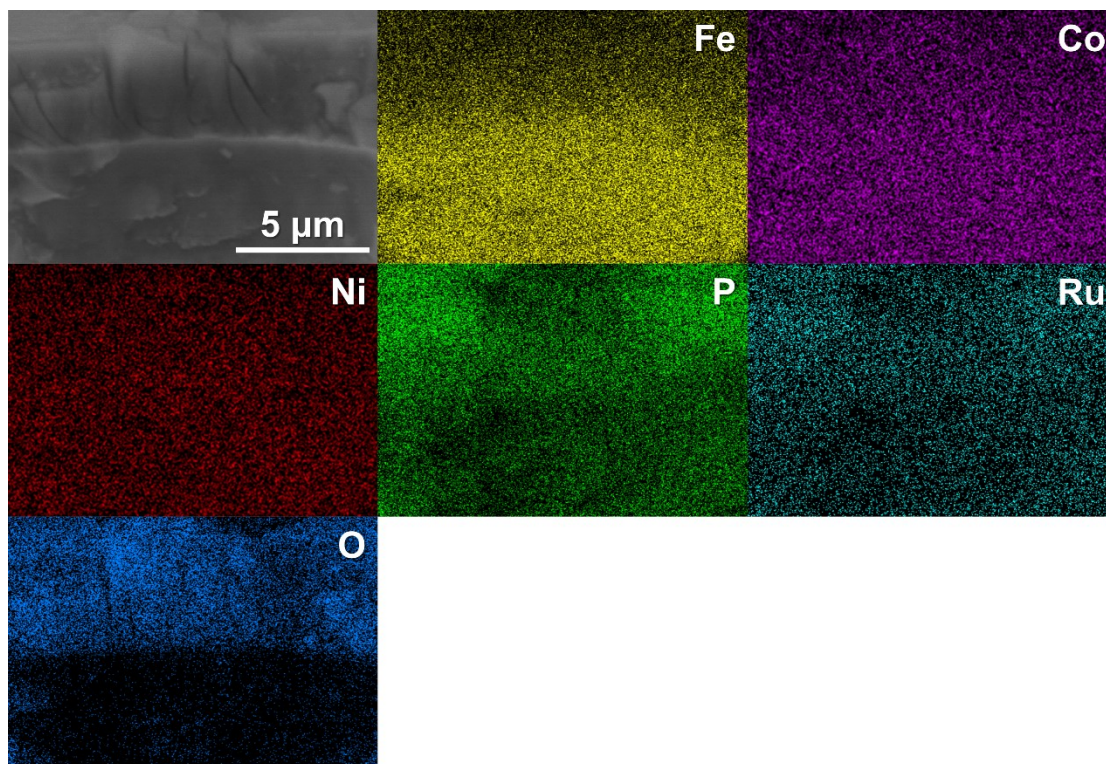

**Fig. S33** Cross-sectional SEM images and EDS mapping images of Ru2-De after a 4-day constant current test at 500 mA cm<sup>-2</sup>.

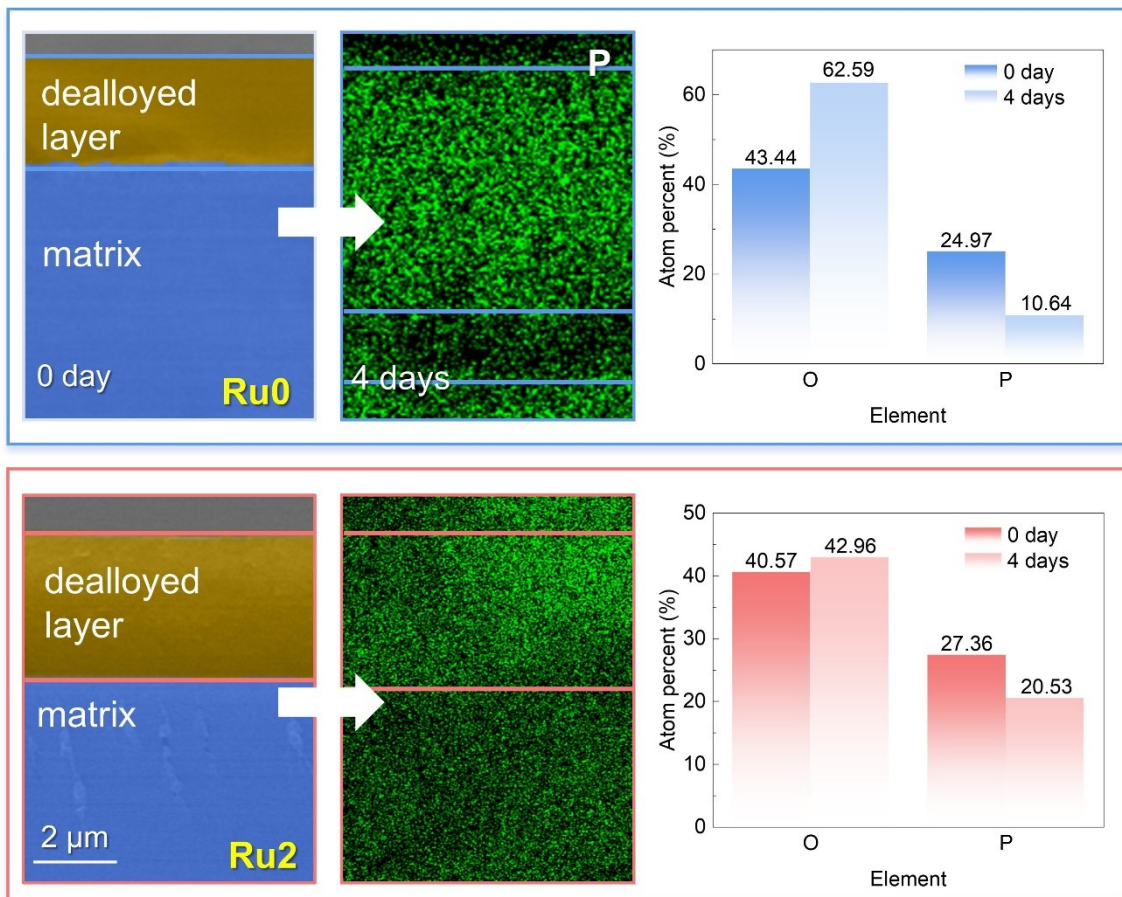

**Fig. S34** Comparison of the cross-sectional SEM and EDS dealloyed layer P and O element content of the two before and after constant current testing

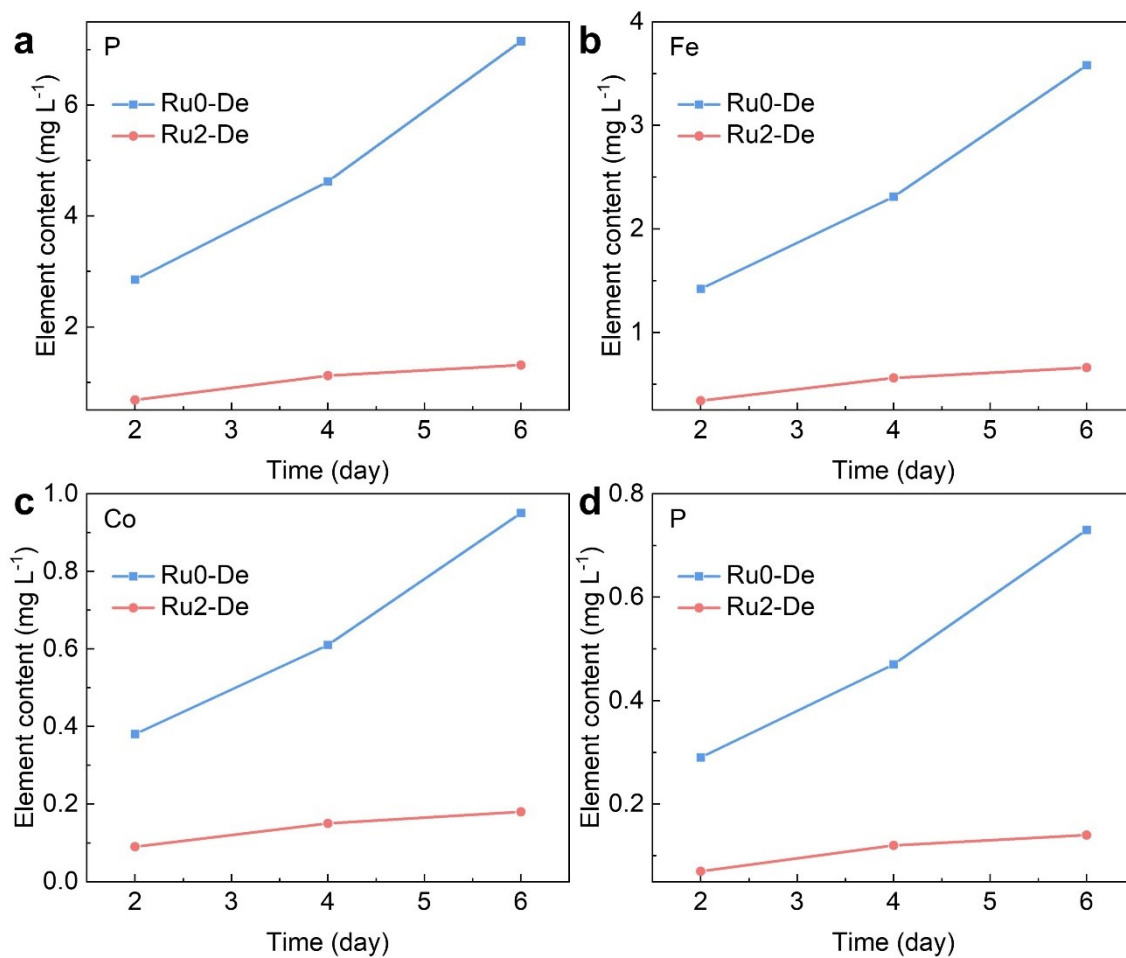

**Fig. S35** ICP-OES results of Ru0-De and Ru2-De tested for 2 days, 4 days and 6 days at an anodic constant current density of 500mA cm<sup>-2</sup>.

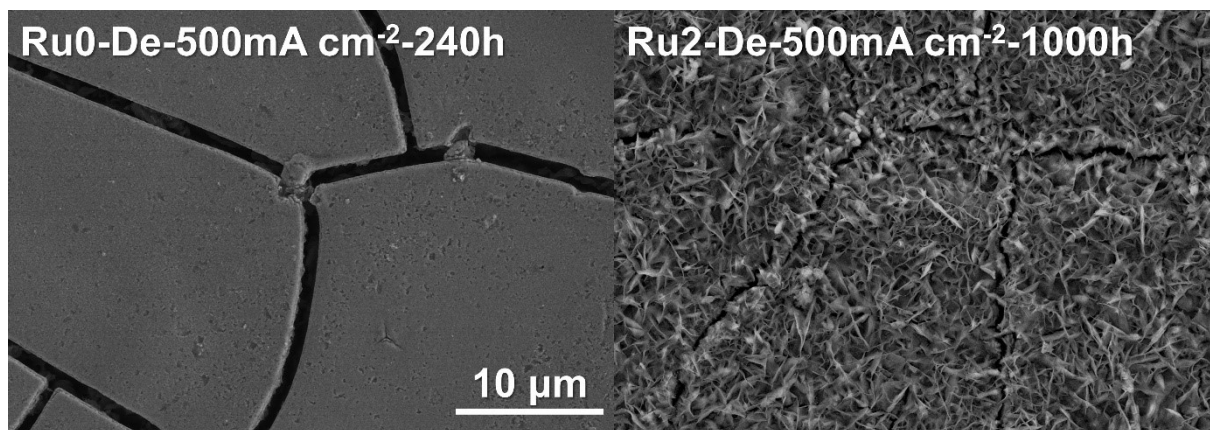

**Fig. S36** SEM image after HER stability test.

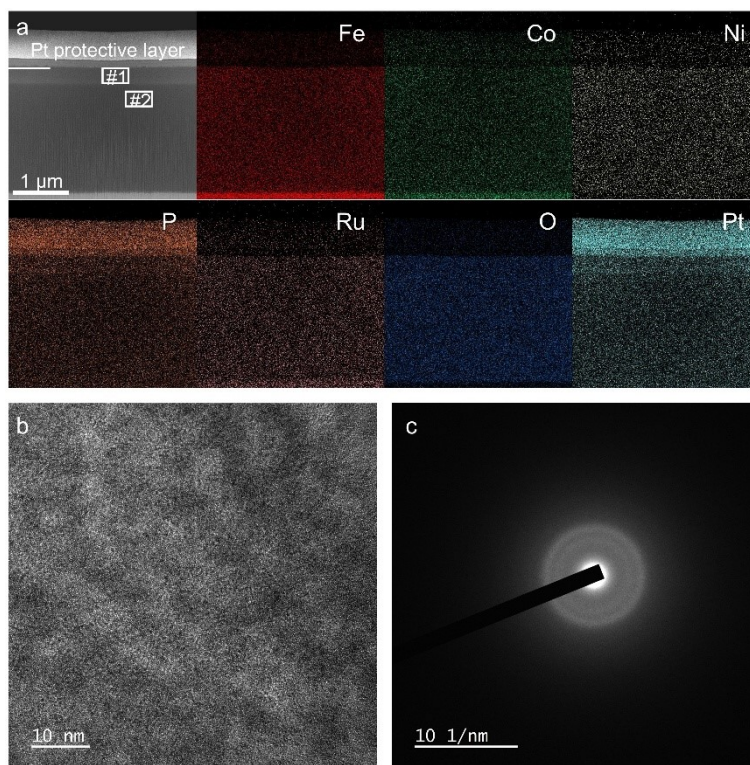

**Fig. S37** HER stability test after (a) cross-sectional EDS surface scan, (b) HRTEM image, (c) SAED pattern.

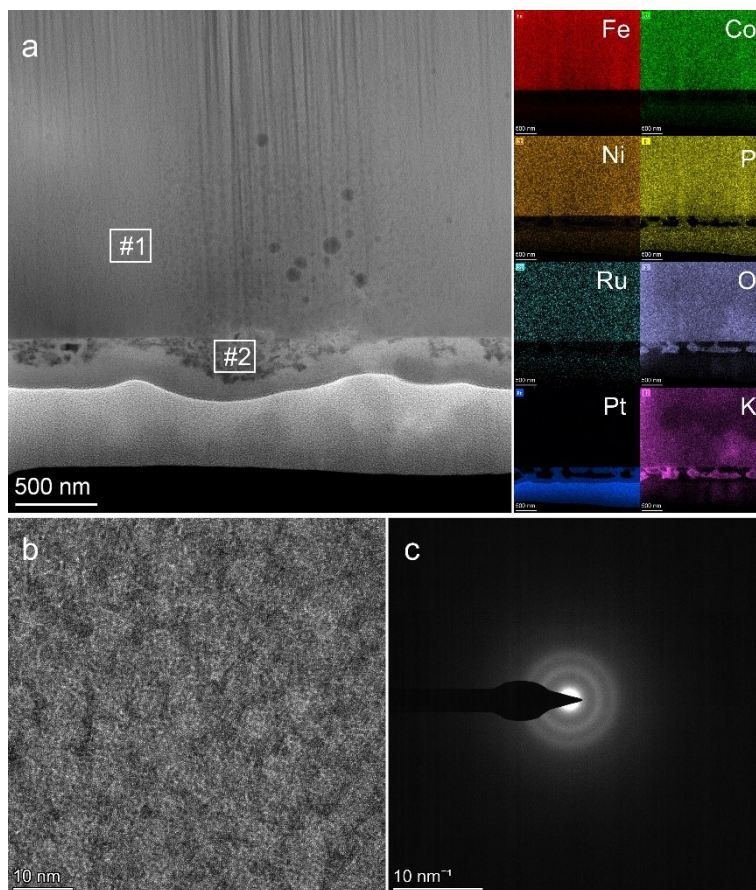

**Fig. S38** OER stability test after (a) cross-sectional EDS surface scan, (b) HRTEM image, (c) SAED pattern.

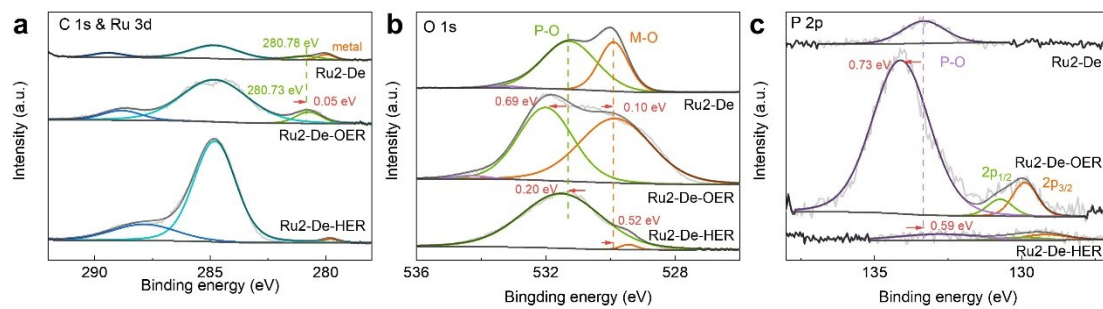

**Fig. S39** Comparison of (a) Ru 3d, (b) O 1s, and (c) P 2p XPS fine spectra of Ru2-De before and after the stability test.

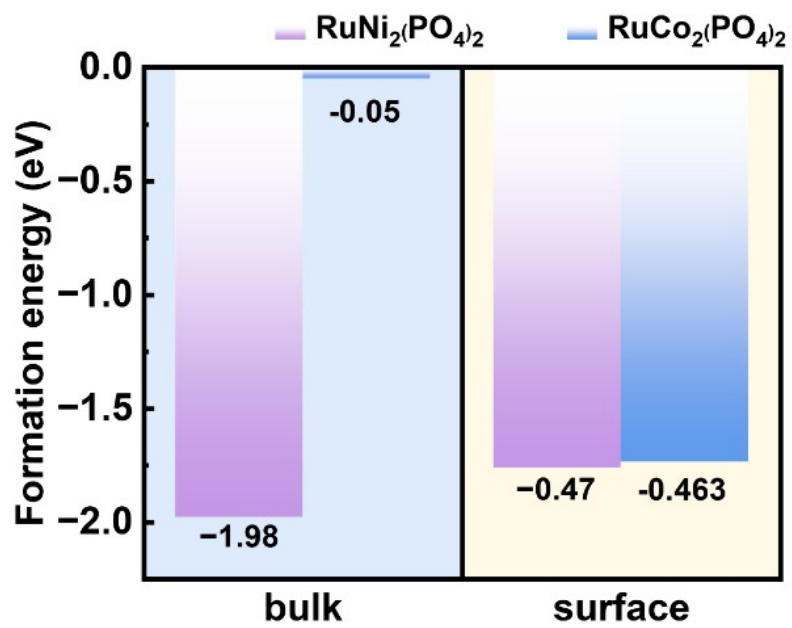

**Fig. S40** Formation energy of the RuNi<sub>2</sub>(PO<sub>4</sub>)<sub>2</sub> and RuCo<sub>2</sub>(PO<sub>4</sub>)<sub>2</sub> phases and surfaces.

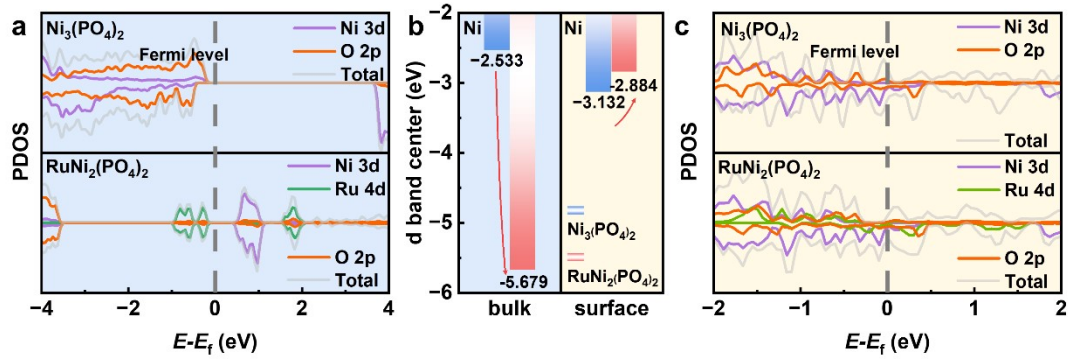

**Fig. S41** Comparison of the bulk and surface PDOS of  $\text{Ni}_3(\text{PO}_4)_2$  and the d-band center of Ni before and after Ru doping.

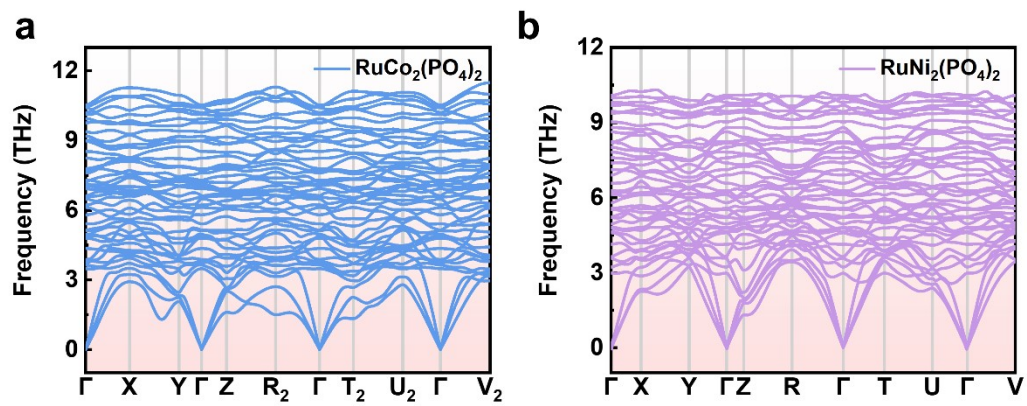

**Fig. S42** Phonon spectra of RuNi<sub>2</sub>(PO<sub>4</sub>)<sub>2</sub> and RuCo<sub>2</sub>(PO<sub>4</sub>)<sub>2</sub>.

**Table S1.** Comparison of HER performance of different electrocatalysts in alkaline media.

| Catalyst                                                          | Tafel slope (mV dec <sup>-1</sup> ) | Overpotential @10mA cm <sup>-2</sup> (mV) | IR correction status | Electrolyte concentration | Temperature (°C) | Catalyst loading (mg cm <sup>-2</sup> ) | Reference |
|-------------------------------------------------------------------|-------------------------------------|-------------------------------------------|----------------------|---------------------------|------------------|-----------------------------------------|-----------|
| <b>no-noble metal</b>                                             |                                     |                                           |                      |                           |                  |                                         |           |
| np-CuTi                                                           | 110                                 | 55                                        | YES                  | 0.1 M KOH                 | /                | /                                       | 3         |
| Ni <sub>2</sub> P/NF                                              | 50                                  | 41                                        | /                    | 1 M KOH                   | /                | /                                       | 4         |
| Co <sub>2</sub> P                                                 | 66                                  | 183                                       | /                    | 1 M KOH                   | /                | /                                       | 5         |
| Ni <sub>40</sub> Fe <sub>40</sub> P <sub>20</sub>                 | 89                                  | 270                                       | YES                  | 1 M KOH                   | /                | /                                       | 6         |
| P <sub>8.6</sub> -Co <sub>3</sub> O <sub>4</sub> /NF              | 86                                  | 97                                        | /                    | 1 M KOH                   | 25               | /                                       | 7         |
| D15h-FeCoNiAlTi                                                   | 40.                                 | 88.2                                      | YES                  | 1 M KOH                   | /                | /                                       | 8         |
| 1                                                                 | 1                                   |                                           |                      |                           |                  |                                         |           |
| FeCoNiMoP-S-20                                                    | 57                                  | 146                                       | /                    | 1 M NaOH                  | /                | /                                       | 9         |
| Fe-Co-Ni-P-B                                                      | 82.                                 | 350                                       | /                    | 1 M KOH                   | /                | /                                       | 10        |
| 8                                                                 | 8                                   |                                           |                      |                           |                  |                                         |           |
| Ni-Fe-Sn                                                          | 98.                                 | 27                                        | 95%                  | 1 M KOH                   | 25               | /                                       | 11        |
| 6                                                                 | 6                                   |                                           |                      |                           |                  |                                         |           |
| Ni <sub>46</sub> Mn <sub>36</sub> Sn <sub>11</sub> C <sub>7</sub> | 118                                 | 290                                       | /                    | 1 M KOH                   | /                | /                                       | 12        |
| 07                                                                | 07                                  |                                           |                      |                           |                  |                                         |           |
| Ni <sub>81</sub> P <sub>19</sub>                                  | 69                                  | 140                                       | YES                  | 1 M KOH                   | /                | /                                       | 13        |
| CoBO <sub>x</sub> /NiSe                                           | 25.                                 | 14.5                                      | YES                  | 1 M KOH                   | /                | /                                       | 14        |
| 5                                                                 | 5                                   |                                           |                      |                           |                  |                                         |           |
| Ni <sub>2</sub> P/V-Pi/CC                                         | 66.                                 | 80.8                                      | /                    | 1 M KOH                   | /                | /                                       | 15        |
| 5                                                                 | 5                                   |                                           |                      |                           |                  |                                         |           |
| I-Ni@C                                                            | 60                                  | 78                                        | /                    | 1 M KOH                   | /                | 0.28                                    | 16        |
| Fe-P                                                              | 102                                 | 436                                       | /                    | 1 M KOH                   | 20               | /                                       | 17        |
| .3                                                                | .3                                  |                                           |                      |                           |                  |                                         |           |
| VOOH                                                              | 104                                 | 164                                       | /                    | 1 M KOH                   | /                | 0.8                                     | 18        |
| V/NF                                                              | 82                                  | 125                                       | 95%                  | 1 M KOH                   | /                | /                                       | 19        |
| Ni <sub>0.75</sub> Fe <sub>0.125</sub> V <sub>0.1</sub>           | 62                                  | 125                                       | /                    | 1 M KOH                   | /                | /                                       | 20        |
| 25-LDHs/NF                                                        |                                     |                                           |                      |                           |                  |                                         |           |
| Ni-Fe-Sn/NF                                                       | 150                                 | 100                                       | /                    | 1 M KOH                   | 25               | /                                       | 21        |
| .8                                                                | .8                                  |                                           |                      |                           |                  |                                         |           |
| Ni <sub>3</sub> Fe@BC                                             | 127                                 | 330                                       | YES                  | 1 M KOH                   | /                | 0.357                                   | 22        |
| Cu <sub>81</sub> (Ni <sub>3</sub> Co) <sub>19</sub>               | 73.                                 | 35                                        | YES                  | 1 M KOH                   | 25               | /                                       | 23        |
| 3                                                                 | 3                                   |                                           |                      |                           |                  |                                         |           |
| <b>noble metal</b>                                                |                                     |                                           |                      |                           |                  |                                         |           |
| Pt-TiN NAs                                                        | 98.                                 | 139                                       | /                    | 1 M KOH                   | /                | /                                       | 24        |
| 3                                                                 | 3                                   |                                           |                      |                           |                  |                                         |           |
| (Ru-Co)O <sub>x</sub>                                             | 23.                                 | 44.1                                      | /                    | 1 M KOH                   | /                | /                                       | 25        |
| 5                                                                 | 5                                   |                                           |                      |                           |                  |                                         |           |
| FeCoNiMnRu La/CNT                                                 | 116                                 | 50                                        | /                    | 1 M KOH                   | /                | 1.02                                    | 26        |
| MoP-                                                              | 36.                                 | 47                                        | 95%                  | 1 M KOH                   | /                | /                                       | 27        |

|                                                                                                    |           |     |      |             |    |       |  |              |
|----------------------------------------------------------------------------------------------------|-----------|-----|------|-------------|----|-------|--|--------------|
| Ru <sub>2</sub> P/NPC                                                                              | 93        |     |      |             |    |       |  |              |
| Ru <sub>2</sub> P@PNC/C<br>C-900                                                                   | 66        | 50  | /    | 1 M KOH     | /  | /     |  | 28           |
| Ru <sub>0.33</sub> Se@TN<br>A                                                                      | 50        | 57  | 0.9  | 1 M KOH     | 25 | 0.2   |  | 29           |
| Pt <sub>1</sub> /N-C                                                                               | 36.<br>8  | 46  | /    | 1 M KOH     | 25 | 0.25  |  | 30           |
| Ni-Fe-Pt NCs                                                                                       | 81        | 463 | /    | 1 M KOH     | 25 | 0.141 |  | 31           |
| H-INT                                                                                              | 38        | 48  | /    | 1 M KOH     | 25 | /     |  | 32           |
| Ru/C <sub>3</sub> N <sub>4</sub> /C                                                                | 69        | 79  | YES  | 0.1M<br>KOH | 25 | 0.204 |  | 33           |
| Pt Ni                                                                                              | 74        | 65  | YES  | 0.1M<br>KOH | 20 | 0.076 |  | 34           |
| RuO <sub>2</sub> /Co <sub>3</sub> O <sub>4</sub>                                                   | 91        | 89  | NO   | 1 M KOH     | 25 | 0.285 |  | 35           |
| β -Ni(OH) <sub>2</sub> /Pt                                                                         | 42        | 92  | YES  | 0.1M<br>KOH | 25 | 0.013 |  | 36           |
| Ni <sub>3</sub> N/Pt                                                                               | 36.<br>5  | 50  | 0.8  | 1 M KOH     | 25 | /     |  | 37           |
| Sr <sub>2</sub> RuO <sub>4</sub>                                                                   | 51        | 61  | YES  | 1 M KOH     | 25 | 0.464 |  | 38           |
| 1D-RuO <sub>2</sub> -CNx                                                                           | 70        | 95  | YES  | 0.5M<br>KOH | 25 | 0.17  |  | 39           |
| Ru <sub>3</sub> Sn <sub>7</sub>                                                                    | 40        | 27  | YES  | 1M KOH      | 25 | 0.707 |  | 40           |
| Ru NPs/TiN                                                                                         | 41.<br>4  | 28  | YES  | 1M KOH      | 25 | /     |  | 41           |
| Ni <sub>40</sub> Zr <sub>40</sub> Ti <sub>17</sub> Pt <sub>3</sub>                                 | 30        | 37  | /    | 1M KOH      | 25 | /     |  | 2            |
| Al <sub>82</sub> Ni <sub>6</sub> Co <sub>3</sub> Mn <sub>3</sub><br>Y <sub>3</sub> Au <sub>3</sub> | 43        | 24  | YES  | 1M KOH      | 25 | /     |  | 42           |
| PdPtCuNiP                                                                                          | 37.<br>4  | 32  | YES  | 1M KOH      | 25 | /     |  | 43           |
| Ru <sub>2</sub>                                                                                    | 92.<br>7  | 299 | 0.95 | 1 M KOH     | 25 | 10.67 |  | This<br>work |
| Ru <sub>2</sub> -De                                                                                | 30.<br>74 | 23  | 0.95 | 1 M KOH     | 25 | /     |  | This<br>work |

**Table S2.** Comparison of the TOF of Ru2-De catalyst with the recently reported state-of-the-art catalysts.

| Electrocatalysts                                   | Overpotential(mV) | TOF(H <sub>2</sub> S <sup>-1</sup> ) | Refs.     |
|----------------------------------------------------|-------------------|--------------------------------------|-----------|
| CoP(C/Z)-0.6                                       | 154               | 0.0477                               | 44        |
| Ni <sub>1</sub> Co <sub>3</sub> @NC                | 28                | 0.328                                | 45        |
| Ru-NiCoP/NF                                        | 100               | 0.54                                 | 46        |
| Ru-MoS <sub>2-x</sub>                              | 200               | 4.29                                 | 47        |
| RuFe/FeNC                                          | 250               | 1.35                                 | 48        |
| CuTz-1/NF                                          | 82                | 0.277                                | 49        |
| NiRuPt/Activated<br>XC-72                          | 100               | 3.88                                 | 50        |
| RuMo/Na-TiO                                        | 40                | 0.71                                 | 51        |
| Ni-Co-Se@NiS <sub>2</sub>                          | 140               | 0.16                                 | 52        |
| MoS <sub>2</sub> /NiFe <sub>2</sub> O <sub>4</sub> | 190               | 0.01                                 | 53        |
| Mn <sub>2</sub> O <sub>3</sub>                     | 163               | 0.00347                              | 54        |
| P-doped Ni-Se                                      | 150               | 0.339                                | 55        |
| Fe@Ni <sub>3</sub> Se <sub>4</sub>                 | 150               | 3.07                                 | 56        |
| Ru2-De                                             | 100               | 1.12                                 | This work |

**Table S3.** Comparison of HER stability of different electrocatalysts in alkaline media.

| Catalyst                                                                                        | The current density for stability test (mA cm <sup>-2</sup> ) | Overpotential (mV) | Stability (h) | Reference |
|-------------------------------------------------------------------------------------------------|---------------------------------------------------------------|--------------------|---------------|-----------|
| Ni <sub>2</sub> P/Ni                                                                            | 10                                                            | 41                 | 75            | 4         |
| Co <sub>2</sub> P                                                                               | 10                                                            | 183                | 15            | 5         |
| Ni <sub>40</sub> Fe <sub>40</sub> P <sub>20</sub>                                               | 10                                                            | 270                | 20            | 6         |
| Pt-TiN NAs                                                                                      | 10                                                            | 139                | 20            | 24        |
| P <sub>8,6</sub> -Co <sub>3</sub> O <sub>4</sub> /NF                                            | 10                                                            | 97                 | 20            | 7         |
| Pd <sub>45</sub> Cu <sub>39</sub> Ru <sub>16</sub> /C-450                                       | 10                                                            | 31                 | 15            | 57        |
| Ru-MnFeP/NF                                                                                     | 10                                                            | 35                 | 50            | 58        |
| (Ru-Co) O <sub>x</sub>                                                                          | 10                                                            | 44.1               | 10            | 25        |
| PdPtCuNiP                                                                                       | 20                                                            | 60                 | 100           | 43        |
| FeCoNiMoP-S-20                                                                                  | 10                                                            | 146                | 24            | 9         |
| Al <sub>82</sub> Ni <sub>6</sub> Co <sub>3</sub> Mn <sub>3</sub> Y <sub>3</sub> Au <sub>3</sub> | 20                                                            | 35                 | 12            | 42        |
| Ni-Fe-Sn/NF                                                                                     | 10                                                            | 100                | 12            | 21        |
| Ni-Fe-Sn                                                                                        | 10                                                            | 27                 | 55            | 11        |
| CoBO <sub>x</sub> /NiSe                                                                         | 10                                                            | 14.5               | 100           | 14        |
| NiFeCoCuTi                                                                                      | 250                                                           | 80                 | 240           | 59        |
| Ti <sub>37</sub> Cu <sub>60</sub> Ru <sub>3</sub>                                               | 10                                                            | 35                 | 10            | 60        |
| Ru <sub>3</sub> Sn <sub>7</sub>                                                                 | 10                                                            | 30                 | 50            | 40        |
| Ru <sub>0.48</sub> Re <sub>0.52</sub> NPs@rGO                                                   | 10                                                            | 14                 | 24            | 61        |
| (FeCoNiB <sub>0.75</sub> ) <sub>97</sub> Pt <sub>3</sub>                                        | 100                                                           | 70                 | 200           | 62        |
| I-Ni@C                                                                                          | 20                                                            | 120                | 80            | 16        |
| Cu <sub>81</sub> (Ni,Co) <sub>19</sub>                                                          | 10                                                            | 35                 | 72            | 23        |
| Fe-P                                                                                            | 10                                                            | 436                | 207           | 17        |
| VOOH                                                                                            | 10                                                            | 167                | 25            | 18        |
| V/NF                                                                                            | 20                                                            | 160                | 24            | 19        |
| D15h HEIs                                                                                       | 20                                                            | 130                | 40            | 8         |
| Ni <sub>46</sub> Mn <sub>36</sub> Sn <sub>11</sub> Co <sub>7</sub>                              | 10                                                            | 290                | 12            | 12        |
| Ni <sub>81</sub> P <sub>19</sub>                                                                | 10                                                            | 180                | 0.17          | 13        |
| Ru/ac-CeO <sub>2-δ</sub>                                                                        | 200                                                           | 170                | 100           | 63        |
| Ni <sub>40</sub> Zr <sub>40</sub> Ti <sub>17</sub> Pt <sub>3</sub>                              | 10                                                            | 37                 | 72            | 2         |
| Fe <sub>67</sub> Co <sub>10</sub> Ni <sub>10</sub> Zr <sub>10</sub> Pt <sub>3</sub>             | 500                                                           | 75                 | 250           | 64        |
| MoP-Ru <sub>2</sub> P/NPC                                                                       | 10                                                            | 217                | 12            | 27        |
| Ru <sub>2</sub> P@PNC/CC-900                                                                    | 10                                                            | 50                 | 10            | 28        |
| Ru <sub>0.33</sub> Se@TNA                                                                       | 10                                                            | 57                 | 10            | 29        |
| Pt <sub>1</sub> /N-C                                                                            | 10                                                            | 46                 | 20            | 30        |
| Ru <sub>2</sub> -De                                                                             | 500                                                           | 177                | 1000          | This work |

**Table S4.** Comparison of OER performance of different electrocatalysts in alkaline media.

| Catalyst                                          | Tafel slope (mV dec <sup>-1</sup> ) | Overpotential @10mA cm <sup>-2</sup> (mV) | IR correction status | Electrolyte concentration | Temperature (°C) | Catalyst loading (mg cm <sup>-2</sup> ) | Reference |
|---------------------------------------------------|-------------------------------------|-------------------------------------------|----------------------|---------------------------|------------------|-----------------------------------------|-----------|
| Ni <sub>40</sub> Fe <sub>40</sub> P <sub>20</sub> | 35                                  | 270                                       | YES                  | 1 M KOH                   | /                | /                                       | 6         |
| FeNiCoP                                           | 38                                  | 281                                       | YES                  | 1M NaOH                   | 25               | /                                       | 65        |
| CoCuFeLa                                          | 105.04                              | 300                                       | YES                  | 1M KOH                    | 25               | 0.5                                     | 66        |
| Fe-DABDT                                          | 72.2                                | 320                                       | YES                  | 1M KOH                    | 25               | /                                       | 67        |
| FeCoNiCuMn @CF HEAs                               | 28                                  | 260                                       | /                    | 1M KOH                    | 25               | 19.8                                    | 68        |
| Fe-P                                              | 77.2                                | 527                                       | /                    | 1 M KOH                   | 20               | /                                       | 17        |
| FeCoNiMnRuLa/CNT                                  | 47.5                                | 281                                       | /                    | 1 M KOH                   | /                | 1.02                                    | 26        |
| P-Co <sub>3</sub> O <sub>4</sub> /NF              | 60                                  | 260                                       | /                    | 1 M KOH                   | 25               | /                                       | 7         |
| Fe <sub>7</sub> Se <sub>8</sub>                   | 76.6                                | 259                                       | /                    | 1M KOH                    | 25               | /                                       | 69        |
| IrO <sub>2</sub>                                  | 45                                  | 260                                       | 0.95                 | 0.1M KOH                  | 25               | /                                       | 70        |
| MoS <sub>2</sub> /NiS <sub>2</sub>                | 91.7                                | 278                                       | YES                  | 1M KOH                    | 25               | /                                       | 71        |
| IrO <sub>2</sub> /C                               | 84.4                                | 310                                       | YES                  | 1M KOH                    | 25               | 0.2                                     | 72        |
| CoMoO <sub>4</sub>                                | 56                                  | 312                                       | NO                   | 1M KOH                    | 25               | 0.1                                     | 73        |
| FeCo LDH                                          | 85                                  | 331                                       | 0.95                 | 1M KOH                    | 25               | 0.21                                    | 74        |
| As-Ru2                                            | 92.7                                | 299                                       | 0.95                 | 1 M KOH                   | 25               | 10.67                                   | This work |
| Ru2-De                                            | 30.74                               | 23                                        | 0.95                 | 1 M KOH                   | 25               | /                                       | This work |

**Table S5.** Comparison of OWS performance of different electrocatalysts in alkaline media.

| Catalyst                                | Overall water splitting<br>@500mA cm <sup>-2</sup> (V) | Electrolyte | Reference |
|-----------------------------------------|--------------------------------------------------------|-------------|-----------|
| Ni <sub>2</sub> P-Fe <sub>2</sub> P/NF  | 1.865                                                  | 1 M KOH     | 75        |
| NiCoP/NF                                | 1.83                                                   | 1 M KOH     | 76        |
| Fe <sub>2</sub> P/Co <sub>2</sub> N     | 1.663                                                  | 1 M KOH     | 77        |
| NiCo(nf)-P                              | 1.86                                                   | 1 M KOH     | 78        |
| Ru-CMOP                                 | 1.828                                                  | 1 M KOH     | 79        |
| NiCoP-2/NF                              | 2.13                                                   | 1 M KOH     | 80        |
| NiCo <sub>3</sub> P.C/NF                | 2.6                                                    | 1 M KOH     | 81        |
| W/NiB                                   | 1.85                                                   | 1 M KOH     | 82        |
| CrP-Re <sub>2</sub> P                   | 1.89                                                   | 1 M KOH     | 83        |
| NiCoMoO                                 | 1.95                                                   | 1 M KOH     | 84        |
| Fe/Ni <sub>2</sub> P                    | 1.78                                                   | 1 M KOH     | 85        |
| (Fe,Ni) <sub>2</sub> P                  | 1.88                                                   | 1 M KOH     | 86        |
| MnO/NiFeP                               | 1.79                                                   | 1 M KOH     | 87        |
| MnO/NiFeP                               | 1.87                                                   | 1 M KOH     | 88        |
| FeCoNi                                  | 1.87                                                   | 1 M KOH     | 89        |
| Ni-FeS <sub>x</sub> /NiFe               | 2.6                                                    | 1 M KOH     | 90        |
| Ni <sub>2</sub> P/FeP                   | 2.39                                                   | 1 M KOH     | 91        |
| Co-Mn-B                                 | 2.1                                                    | 1 M KOH     | 92        |
| NiMoB                                   | 2.2                                                    | 1 M KOH     | 93        |
| Ni <sub>2</sub> P/CoP-NF                | 1.91                                                   | 1 M KOH     | 94        |
| Ru,Fe-Ni <sub>5</sub> P <sub>4</sub> /C | 1.872                                                  | 1 M KOH     | 95        |
| 3D RuCoP/NF                             | 1.82                                                   | 1 M KOH     | 96        |
| Ru/CuMnBP                               | 2.03                                                   | 1 M KOH     | 97        |
| Ru-NiCoP@NF                             | ~1.78                                                  | 1 M KOH     | 98        |
| Ru0-De                                  | 1.79                                                   | 1 M KOH     | This work |
| Ru2-De                                  | 1.7                                                    | 1 M KOH     | This work |

## Reference

1. Z. Jia, Y. Zhao, Q. Wang, F. Lyu, X. Tian, S.-X. Liang, L.-C. Zhang, J. Luan, Q. Wang, L. Sun, T. Yang and B. Shen, *ACS Applied Materials & Interfaces*, 2022, 14, 10288-10297.
2. R. Li, X. Liu, R. Wu, J. Wang, Z. Li, K. C. Chan, H. Wang, Y. Wu and Z. Lu, *Advanced Materials*, 2019, 31, 1904989.
3. Q. Lu, G. S. Hutchings, W. Yu, Y. Zhou, R. V. Forest, R. Tao, J. Rosen, B. T. Yonemoto, Z. Cao, H. Zheng, J. Q. Xiao, F. Jiao and J. G. Chen, *Nature Communications*, 2015, 6.
4. Y. Shi, Y. Xu, S. Zhuo, J. Zhang and B. Zhang, *ACS Applied Materials & Interfaces*, 2015, 7, 2376-2384.
5. C. G. Read, J. F. Callejas, C. F. Holder and R. E. Schaak, *ACS Applied Materials & Interfaces*, 2016, 8, 12798-12803.
6. Y. Tan, F. Zhu, H. Wang, Y. Tian, A. Hirata, T. Fujita and M. Chen, *Advanced Materials Interfaces*, 2017, 4, 1601086.
7. Z. Wang, H. Liu, R. Ge, X. Ren, J. Ren, D. Yang, L. Zhang and X. Sun, *ACS Catalysis*, 2018, 8, 2236-2241.
8. Z. Jia, T. Yang, L. Sun, Y. Zhao, W. Li, J. Luan, F. Lyu, L. C. Zhang, J. J. Kruzic, J. J. Kai, J. C. Huang, J. Lu and C. T. Liu, *Advanced Materials*, 2020, 32.
9. S. Jiang, L. Zhu, Z. Yang and Y. Wang, *Electrochimica Acta*, 2021, 389.
10. L. Cai, J. Huo, P. Zou, G. Li, J. Liu, W. Xu, M. Gao, S. Zhang and J.-Q. Wang, *ACS Applied Materials & Interfaces*, 2022, 14, 15243-15249.
11. S. You, Y. Wu, Y. Wang, Z. He, L. Yin, Y. Zhang, Z. Sun and Z. Zhang, *International Journal of Hydrogen Energy*, 2022, 47, 29315-29326.
12. Z. Fan, P. Zou, K. Jiang, W. Xu, M. Gao, V. Zadorozhnyy, G. Li, J. Huo and J.-Q. Wang, *Intermetallics*, 2023, 160.
13. I. Flis-Kabulska and J. Flis, *ChemElectroChem*, 2023, 10.
14. Y. Liu, T. Sakthivel, F. Hu, Y. Tian, D. Wu, E. H. Ang, H. Liu, S. Guo, S. Peng and Z. Dai, *Advanced Energy Materials*, 2023, 13.
15. J. Fan, L. Wang, X. Xiang, Y. Liu, N. Shi, Y. Lin, D. Xu, J. Jiang, Y. Lai, J. Bao and M. Han, *Small Methods*, 2024, 8.
16. C. Liu, B. Sheng, Q. Zhou, Y. Xia, Y. Zou, P. J. Chimtali, D. Cao, Y. Chu, S. Zhao, R. Long, S. Chen and L. Song, *Journal of the American Chemical Society*, 2024, 146, 26844-26854.
17. T. Zhang, X. Ren, S. Mo, W. Cao, C. Zhou, F. Ma, R. Chen, C. Zeng, L. Shi, T. Liu, H. Zhang and H. Ni, *Journal of Materials Science & Technology*, 2024, 199, 66-74.
18. H. Shi, H. Liang, F. Ming and Z. Wang, *Angewandte Chemie International Edition*, 2016, 56, 573-577.
19. Y. Yu, P. Li, X. Wang, W. Gao, Z. Shen, Y. Zhu, S. Yang, W. Song and K. Ding, *Nanoscale*, 2016, 8, 10731-10738.
20. K. N. Dinh, P. Zheng, Z. Dai, Y. Zhang, R. Dangol, Y. Zheng, B. Li, Y. Zong and Q. Yan, *Small*, 2017, 14.
21. Y. Wu, Y. Zhang, Y. Wang, Z. He, Z. Gu and S. You, *International Journal of Hydrogen Energy*, 2021, 46, 26930-26939.
22. Y. B. Adegbemiga, N. Ullah, M. Xie, S. Hussain, C. J. Oluigbo, W. Yaseen, A. J. Kumar, Y. Xu and J. Xie, *Journal of Alloys and Compounds*, 2020, 835.
23. C. Wang, P. Zou, W. Xu, Y. Zhang, J. Huo, J.-Q. Wang, Y. Liu and C. Qin, *Journal of Alloys and Compounds*, 2024, 995, 174790.
24. C. Wang, H. Shi, H. Liu, J. Fu, D. Wei, W. Zeng, Q. Wan, G. Zhang and H. Duan, *Electrochimica Acta*, 2018, 292, 727-735.
25. C. Wang and L. Qi, *Angewandte Chemie International Edition*, 2020, 59, 17219-17224.
26. Z.-L. Wang, G.-Y. Huang, G.-R. Zhu, H.-C. Hu, C. Li, X.-H. Guan and H.-B. Zhu, *Applied*

- Catalysis B: Environment and Energy, 2025, 361.
- 27.Y. Gao, Z. Chen, Y. Zhao, W. Yu, X. Jiang, M. He, Z. Li, T. Ma, Z. Wu and L. Wang, Applied Catalysis B: Environmental, 2022, 303.
- 28.T. Liu, B. Feng, X. Wu, Y. Niu, W. Hu and C. M. Li, ACS Applied Energy Materials, 2018, 1, 3143-3150.
- 29.K. Wang, Q. Chen, Y. Hu, W. Wei, S. Wang, Q. Shen and P. Qu, Small, 2018, 14.
- 30.S. Fang, X. Zhu, X. Liu, J. Gu, W. Liu, D. Wang, W. Zhang, Y. Lin, J. Lu, S. Wei, Y. Li and T. Yao, Nature Communications, 2020, 11.
- 31.M. Fu, Q. Zhang, Y. Sun, G. Ning, X. Fan, H. Wang, H. Lu, Y. Zhang and H. Wang, International Journal of Hydrogen Energy, 2020, 45, 20832-20842.
- 32.D. Liu, Z. Song, S. Cheng, Y. Wang, A. Saad, S. Deng, J. Shen, X. Huang, X. Cai and P. Tsiakaras, Chemical Engineering Journal, 2022, 431.
- 33.Y. Zheng, Y. Jiao, Y. Zhu, L. H. Li, Y. Han, Y. Chen, M. Jaroniec and S.-Z. Qiao, Journal of the American Chemical Society, 2016, 138, 16174-16181.
- 34.Z. Cao, Q. Chen, J. Zhang, H. Li, Y. Jiang, S. Shen, G. Fu, B.-a. Lu, Z. Xie and L. Zheng, Nature Communications, 2017, 8.
- 35.H. Liu, G. Xia, R. Zhang, P. Jiang, J. Chen and Q. Chen, RSC Advances, 2017, 7, 3686-3694.
- 36.X. Yu, J. Zhao, L.-R. Zheng, Y. Tong, M. Zhang, G. Xu, C. Li, J. Ma and G. Shi, ACS Energy Letters, 2017, 3, 237-244.
- 37.Y. Wang, L. Chen, X. Yu, Y. Wang and G. Zheng, Advanced Energy Materials, 2016, 7.
- 38.Y. Zhu, H. A. Tahini, Z. Hu, J. Dai, Y. Chen, H. Sun, W. Zhou, M. Liu, S. C. Smith, H. Wang and Z. Shao, Nature Communications, 2019, 10.
- 39.T. Bhowmik, M. K. Kundu and S. Barman, ACS Applied Materials & Interfaces, 2016, 8, 28678-28688.
- 40.Z. Wang, Z. Lin, Y. Wang, S. Shen, Q. Zhang, J. Wang and W. Zhong, Advanced Materials, 2023, 35.
- 41.J. Zhao, R. Urrego-Ortiz, N. Liao, F. Calle-Vallejo and J. Luo, Nature Communications, 2024, 15, 6391.
- 42.X. Liu, S. Ju, P. Zou, L. Song, W. Xu, J. Huo, J. Yi, G. Wang and J.-Q. Wang, Journal of Alloys and Compounds, 2021, 880.
- 43.Z. Jia, K. Nomoto, Q. Wang, C. Kong, L. Sun, L. C. Zhang, S. X. Liang, J. Lu and J. J. Kruzic, Advanced Functional Materials, 2021, 31.
- 44.Y.-L. Meng, J. Tang, X. Chen, Z.-Y. Niu, Y.-H. Zhao, Y. Pan, X.-F. Wang, X.-Z. Song and Z. Tan, Inorganic Chemistry Communications, 2021, 134.
- 45.B. Mohanty, L. Pradhan, B. Satpati, P. Rajput, M. Ghorbani-Asl, Y. Wei, P. W. Menezes, A. V. Krasheninnikov and B. K. Jena, Journal of Power Sources, 2025, 625.
- 46.Y. Guo, G. Zhou and Y. Tong, Dalton Transactions, 2023, 52, 12733-12741.
- 47.X.-Y. Li, S.-J. Zhu, Y.-L. Wang, T. Lian, X.-y. Yang, C.-F. Ye, Y. Li, B.-L. Su and L.-H. Chen, Frontiers in Chemistry, 2022, 10.
- 48.Q. He, Y. Zhou, L. Mou, C. Wu, D. Liu, B. Ge, J. Jiang and L. Song, Energy & Environmental Science, 2025, 18, 1984-1991.
- 49.M. I. Anwar, T. Wang, M. Asad, K. Jabbour, S. Manzoor, L. Ma, N. Ahmed, W. Zhang, M. N. Ashiq and G. Yang, International Journal of Hydrogen Energy, 2024, 51, 242-255.
- 50.T. T. Huynh, V. T. T. Mai, A. Q. K. Nguyen and H. Q. Pham, Advanced Sustainable Systems, 2023, 8.
- 51.G. Lin, Q. Ju, L. Liu, X. Guo, Y. Zhu, Z. Zhang, C. Zhao, Y. Wan, M. Yang, F. Huang and J. Wang, ACS Nano, 2022, 16, 9920-9928.
- 52.S. Jamali, M. Abedini Mohammadi, M. Saghafi Yazdi, M. Talafi Noghani, A. Moghanian, M. Rezayat and M. Morales, Journal of Electroanalytical Chemistry, 2024, 969.
- 53.J. Xu, T. Liu, J. Li, B. Li, Y. Liu, B. Zhang, D. Xiong, I. Amorim, W. Li and L. Liu,

- Energy & Environmental Science, 2018, 11, 1819-1827.
- 54.P. D. Sachin, S. Ashoka S and K. Yogesh, Colloids and Surfaces A: Physicochemical and Engineering Aspects, 2025, 726.
- 55.M. Maleki, A. Sabour Rouhaghdam, G. Barati Darband, D. Han, M. Chehelamirani and S. Shanmugam, Journal of Electroanalytical Chemistry, 2022, 916.
- 56.A. Karmakar, A. V. Krishnan, R. Jayan, R. Madhu, M. M. Islam and S. Kundu, Journal of Materials Chemistry A, 2023, 11, 10684-10698.
- 57.M. Li, M. Luo, Z. Xia, Y. Yang, Y. Huang, D. Wu, Y. Sun, C. Li, Y. Chao, W. Yang, W. Yang, Y. Yu and S. Guo, Journal of Materials Chemistry A, 2019, 7, 20151-20157.
- 58.D. Chen, Z. Pu, R. Lu, P. Ji, P. Wang, J. Zhu, C. Lin, H. W. Li, X. Zhou, Z. Hu, F. Xia, J. Wu and S. Mu, Advanced Energy Materials, 2020, 10.
- 59.H. Shi, X.-Y. Sun, S.-P. Zeng, Y. Liu, G.-F. Han, T.-H. Wang, Z. Wen, Q.-R. Fang, X.-Y. Lang and Q. Jiang, Small Structures, 2023, 4.
- 60.J. Tian, Y. Hu, W. Lu, J. Zhu, X. Liu, J. Shen, G. Wang and J. Schroers, Carbon Energy, 2023, 5.
- 61.S. Xu, P. Zhang, Z. Li, C.-H. Chung, M.-W. Moon, J. M. Kim and P. J. Yoo, Applied Surface Science, 2023, 638.
- 62.X. Zhang, Y. Yang, Y. Liu, Z. Jia, Q. Wang, L. Sun, L. C. Zhang, J. J. Kruzic, J. Lu and B. Shen, Advanced Materials, 2023, 35.
- 63.Q. Qin, H. Jang, X. Jiang, L. Wang, X. Wang, M. G. Kim, S. Liu, X. Liu and J. Cho, Angewandte Chemie International Edition, 2023, 63.
- 64.M. Pan, H. Feng, Z. Zhang, M. Gao, L. Lei, D. Wang, G. Li, J. Huo and J.-Q. Wang, Journal of Materials Chemistry A, 2024, 12, 15334-15342.
- 65.S. Jiang, L. Zhu, Z. Yang and Y. Wang, Electrochimica Acta, 2021, 368, 137618.
- 66.J. Feng, J. Liu, C. Chu, L. Wei, H. Li and J. Shen, Chemical Engineering Journal, 2024, 486.
- 67.L. Lin, Y. Xu, Y. Han, R. Xu, T. Wang, Z. Sun and Z. Yan, Journal of the American Chemical Society, 2024, 146, 7363-7372.
- 68.C. Yu, X.-w. Wang, W.-x. He, Z.-y. Zheng, X.-j. Dang and Y.-f. Zhang, Surfaces and Interfaces, 2024, 46.
- 69.C. Zhong, W. Zhou, X. Luo, T. Li, F. Huang, J. Hu, Z. Jiang, C. Hu, W. Lei and C. Yuan, Nano Letters, 2025, 25, 1550-1557.
- 70.D. Friebel, M. W. Louie, M. Bajdich, K. E. Sanwald, Y. Cai, A. M. Wise, M.-J. Cheng, D. Sokaras, T.-C. Weng, R. Alonso-Mori, R. C. Davis, J. R. Bargar, J. K. Nørskov, A. Nilsson and A. T. Bell, Journal of the American Chemical Society, 2015, 137, 1305-1313.
- 71.J. Lin, P. Wang, H. Wang, C. Li, X. Si, J. Qi, J. Cao, Z. Zhong, W. Fei and J. Feng, Advanced Science, 2019, 6.
- 72.S. Hao, L. Chen, C. Yu, B. Yang, Z. Li, Y. Hou, L. Lei and X. Zhang, ACS Energy Letters, 2019, 4, 952-959.
- 73.M. Q. Yu, L. X. Jiang and H. G. Yang, Chemical Communications, 2015, 51, 14361-14364.
- 74.B. Zhang, X. Zheng, O. Voznyy and R. Comin, Science, 2016, 352, 333-337.
- 75.L. Wu, L. Yu, F. Zhang, B. McElhenny, D. Luo, A. Karim, S. Chen and Z. Ren, Advanced Functional Materials, 2020, 31.
- 76.H.-S. Hu, Y. Li, Y.-R. Shao, K.-X. Li, G. Deng, C.-B. Wang and Y.-Y. Feng, Journal of Power Sources, 2021, 484.
- 77.X. Zhou, Y. Mo, F. Yu, L. Liao, X. Yong, F. Zhang, D. Li, Q. Zhou, T. Sheng and H. Zhou, Advanced Functional Materials, 2022, 33.
- 78.Z. Xu, C.-L. Yeh, J.-L. Chen, J. T. Lin, K.-C. Ho and R. Y.-Y. Lin, ACS Sustainable Chemistry & Engineering, 2022, 10, 11577-11586.
- 79.Q. Quan, Y. Zhang, F. Wang, X. Bu, W. Wang, Y. Meng, P. Xie, D. Chen, W. Wang, D.

- Li, C. Liu, S. Yip and J. C. Ho, *Nano Energy*, 2022, 101.
- 80.X. Wang, H. Tian, L. Zhu, S. Li and X. Cui, *Nanomaterials*, 2024, 14.
- 81.S. Sidra, V. H. Hoa and D. H. Kim, *Journal of Energy Chemistry*, 2025, 103, 264-273.
- 82.M. A. Habib, S. A. Dristy, S. Lin, M. H. Joni, M. Najibullah, R. Mandavkar and J. Lee, *Advanced Materials Technologies*, 2025, 10.
- 83.L. Wang, Z. Huang, H. Huang, S. Zhong, M. Huang, T. T. Isimjan and X. Yang, *Electrochimica Acta*, 2022, 404.
- 84.Y. Li, K. Xiao, C. Huang, J. Wang, M. Gao, A. Hu, Q. Tang, B. Fan, Y. Xu and X. Chen, *Nano-Micro Letters*, 2020, 13.
- 85.D. Li, Z. Li, R. Zou, G. Shi, Y. Huang, W. Yang, W. Yang, C. Liu and X. Peng, *Applied Catalysis B: Environment and Energy*, 2022, 307.
- 86.Y. Li, X. Yu, J. Gao and Y. Ma, *Chemical Engineering Journal*, 2023, 470.
- 87.P. Wang, Y. Luo, G. Zhang, M. Wu, Z. Chen, S. Sun and Z. Shi, *Small*, 2021, 18.
- 88.X. Guo, M. Li, L. He, S. Geng, F. Tian, Y. Song, W. Yang and Y. Yu, *Nanoscale*, 2021, 13, 14179-14185.
- 89.L. Chen, Y. Wang, X. Zhao, Y. Wang, Q. Li, Q. Wang, Y. Tang and Y. Lei, *Journal of Materials Science & Technology*, 2022, 110, 128-135.
- 90.Q. Che, Q. Li, Y. Tan, X. Chen, X. Xu and Y. Chen, *Applied Catalysis B: Environmental*, 2019, 246, 337-348.
- 91.H. Jiang, S. Zhang, Q. Fu, L. Yan, J. Zhang and X. Zhao, *Molecules*, 2023, 28.
- 92.M. A. H. S. Lin, R. Mandavkar, R. Kulkarni, S. Burse, Y. U. Chung, C. Liu, Z. Wang, S. Lin, J. H. Jeong, J. Lee, *Adv. Sustain. Syst*, 2022, 6, 2270022.
- 93.R. Mandavkar, M. A. Habib, S. Lin, R. Kulkarni, S. Burse, J.-H. Jeong and J. Lee, *Applied Materials Today*, 2022, 29.
- 94.H. Zhao and Z.-Y. Yuan, *Smart Materials and Devices*, 2025, <https://doi.org/10.70401/smd.2025.0013>.
- 95.Y. Wang, Q. Ye, L. Lin, Y. Zhao and Y. Cheng, *Journal of Colloid and Interface Science*, 2023, 651, 1008-1019.
- 96.Y. Yang, Q. Liu, H. Wang, H. Wen, Z. Peng, K. Xiang, C. Gao, X. Wu, B. Li and Z. Liu, *ACS Omega*, 2021, 6, 10234-10241.
- 97.S. Lin, R. Mandavkar, M. A. Habib, S. A. Dristy, M. H. Joni, J.-H. Jeong and J. Lee, *Journal of Colloid and Interface Science*, 2025, 677, 587-598.
- 98.M. Zhao, S. Zhang, Y. Hu, H. Xing, C. Li, W. Yuan, W. Sun, C. Guo and C. M. Li, *International Journal of Hydrogen Energy*, 2024, 51, 998-1009.
